# Supplementary material for: Ion responsive near-IR BODIPY dyes: two isomers, two different signals
Source: Royal Society of Chemistry journal article supplement (doi:10.1039/c4ra00989d), 2014-01-01
Supplement: c4ra00989d1.pdf [file c4ra00989d1.pdf]

## SUPPORTING INFORMATION

# Ion Responsive Near-IR BODIPY Dyes: Two Isomers, Two Different Signals

Tugba Ozdemir,<sup>a</sup> Ziya Kostereli,<sup>b</sup> Ruslan Guliyev,<sup>b</sup> Soydan Yalcin,<sup>c</sup> Yavuz Dede,<sup>c</sup> Engin U. Akkaya,<sup>\*,a,b</sup>

<sup>a</sup>UNAM-National Nanotechnology Research Center and <sup>b</sup> Department of Chemistry, Bilkent University, 06800 Ankara, Turkey. <sup>c</sup> Department of Chemistry, Gazi University, Ankara, 06500, Turkey.

\*eua@fen.bilkent.edu.tr

### Contents:

|                                                                           |    |
|---------------------------------------------------------------------------|----|
| 1. Experimental Section.....                                              | 2  |
| 2. Photophysical Data.....                                                | 10 |
| 3. <sup>1</sup> H, <sup>13</sup> C NMR and Mass Spectra of compounds..... | 16 |
| 4. Computational Details.....                                             | 25 |

## Supporting Information

### EXPERIMENTAL PROCEDURES

General:  $^1\text{H}$  NMR and  $^{13}\text{C}$  NMR spectra were recorded on Bruker DPX-400 (operating at 400 MHz for  $^1\text{H}$  NMR and 100 MHz for  $^{13}\text{C}$  NMR) in  $\text{CDCl}_3$  with tetramethylsilane as internal standard. All spectra were recorded at  $25^\circ\text{C}$  and coupling constants (J values) are given in Hz. Chemical shifts are given in parts per million (ppm). Absorption spectra were performed by using a Varian Cary-100 spectrophotometer. Fluorescence measurements were conducted on a Varian Eclipse spectrofluorometer. Mass spectra were recorded on Agilent Technologies 6530 Accurate-Mass Q-TOF LC/MS. Reactions were monitored by thin layer chromatography using Merck TLC Silica gel 60 F254. Silica gel column chromatography was performed over Merck Silica gel 60 (particle size: 0.040-0.063 mm, 230-400 mesh ASTM). Compounds **5**<sup>1</sup>, **6**<sup>2</sup>, **9**<sup>3</sup> and  $\text{PEG}_{2000}\text{-N}_3$ <sup>2</sup> were synthesized according to literature. All other reagents and solvents were purchased from Aldrich and used without further purification. For a typical ITC run, the instrument chamber (200  $\mu\text{L}$ ) contained a solution of a ligand (0.125 mM) while a 2.5 mM solution of  $\text{Hg}(\text{ClO}_4)_2$  was taken up in a 40  $\mu\text{L}$  injection syringe. The syringe was assembled into the chamber for equilibration while stirring at 750 rpm. The chamber temperature was set to  $25^\circ\text{C}$ . The injections were programmed at 0.5  $\mu\text{L}$  each, added over 3 sec and spaced 2 min apart.<sup>4</sup> Association enthalpy ( $\Delta\text{H}^\circ$  in cal/mol), “number of sites” (N), and association constant (K in  $\text{M}^{-1}$ ) were obtained by fitting the titration data using the “Two Set of Sites model” algorithm provided in the S3 MicroCal Origin Software package (version 7.0). Association entropy ( $\Delta\text{S}$  in cal/mol/K) is calculated from fitted values of  $\Delta\text{H}^\circ$  and K.

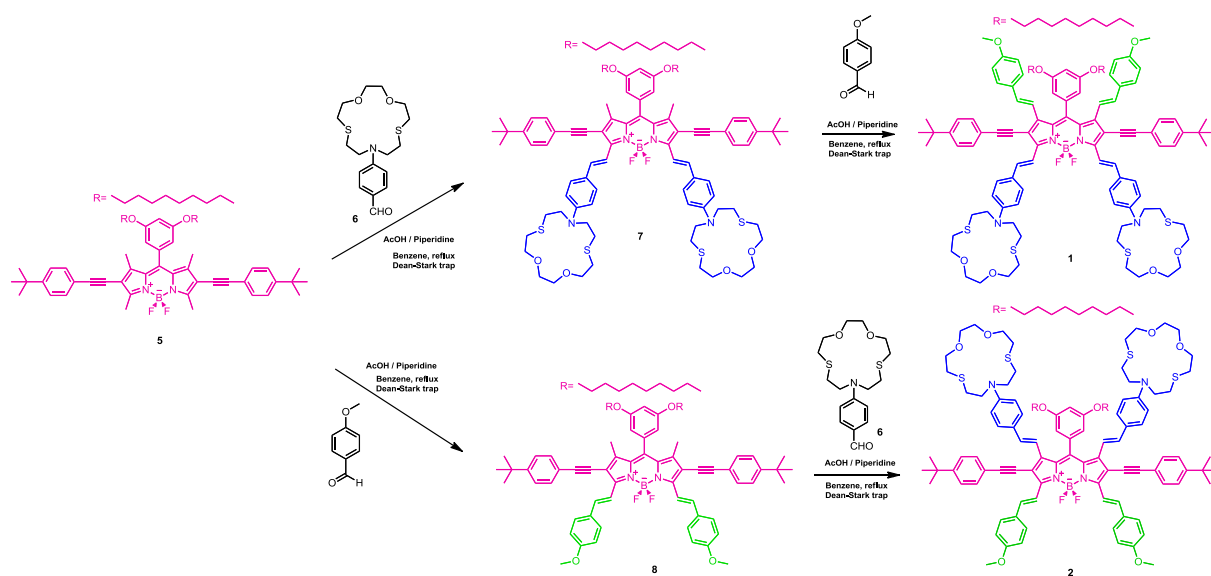

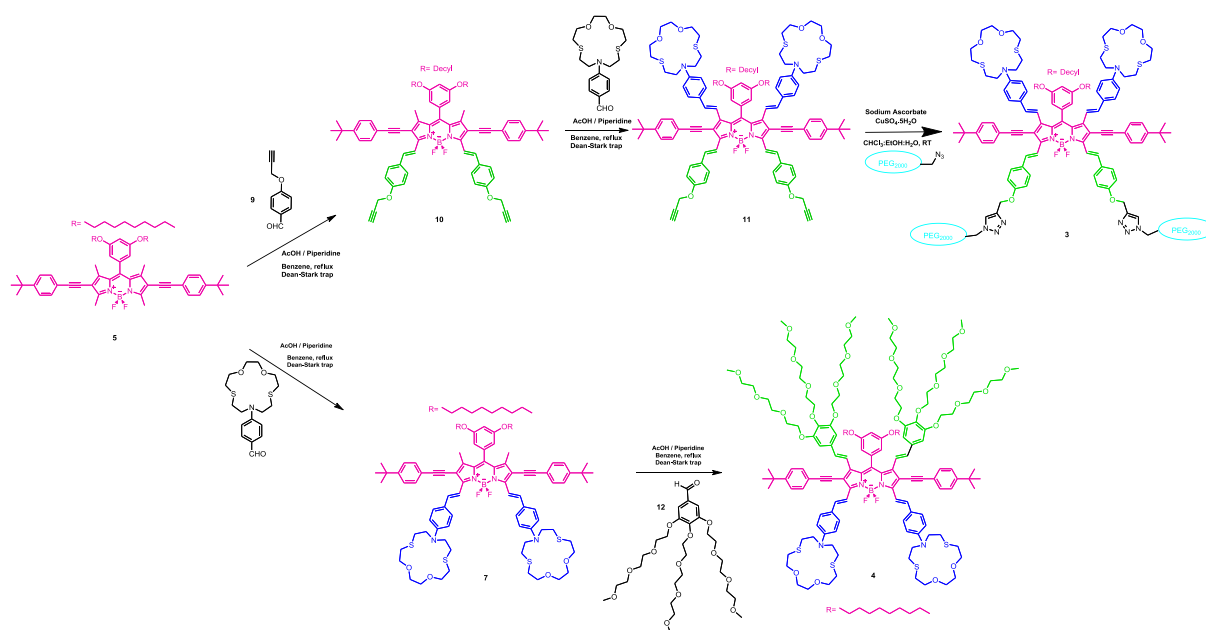

**Scheme S1.** Synthesis of target compounds.

### Synthesis of Compound 7:

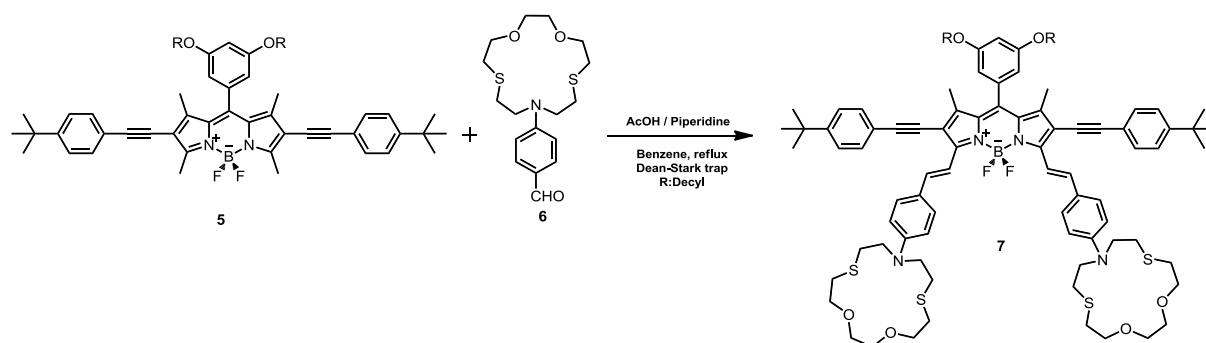

In a 100 mL round-bottomed flask containing 50 mL benzene, Compound **5** (0.137 mmol, 130 mg) and compound **6** (0.342 mmol, 121 mg) piperidine (0.3 mL) and acetic acid (0.3 mL) were added. The mixture was heated under reflux by using a Dean Stark trap and progress of the reaction was monitored by TLC dichloromethane. When all the starting material had been consumed, the mixture was cooled to room temperature and solvent was evaporated. Water (100 mL) added to the residue and the product was extracted into the chloroform (3 x 100 mL). Organic phase dried over  $\text{Na}_2\text{SO}_4$ , evaporated and residue was purified by silica gel column chromatography using dichloromethane as the eluant. (144 mg, 65%).  $^1\text{H}$  NMR (400 MHz, Chloroform-*d*)  $\delta$  8.48 (d,  $J = 16.0$  Hz, 2H), 7.69 (d,  $J = 16.1$  Hz, 2H), 7.61 (d,  $J = 8.7$  Hz, 4H), 7.48 (d,  $J = 8.4$  Hz, 4H), 7.42 (d,  $J = 8.5$  Hz, 4H), 6.73 (d,  $J = 8.5$  Hz, 4H), 6.59 (s, 1H), 6.49 (s, 2H), 3.97 (t,  $J = 6.6$  Hz, 4H), 3.84 (t,  $J = 8.0$  Hz, 8H), 3.74 (m, 8H), 3.68 (s, 8H), 2.97 (m, 8H), 2.84 – 2.78 (m, 8H), 1.78 (m, 10H), 1.51 - 1.31 (m, 48H), 0.9 (t, 6H).

## Synthesis of Compound 1:

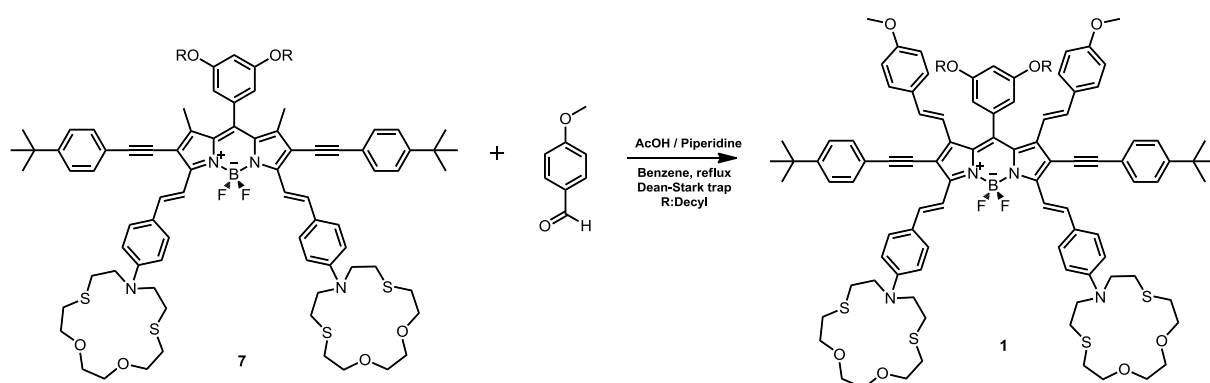

In a 100 mL round-bottomed flask containing 50 mL benzene, Compound 7 (0.023 mmol, 40 mg) and p-anisaldehyde (0.14 mmol, 18 mg) piperidine (0.3 mL) and acetic acid (0.3 mL) were added. The mixture was heated under reflux by using a Dean Stark trap and progress of the reaction was monitored by TLC chloroform. When all the starting material had been consumed, the mixture was cooled to room temperature and solvent was evaporated. Water (100 mL) added to the residue and the product was extracted into the chloroform (3 x 100 mL). Organic phase dried over Na<sub>2</sub>SO<sub>4</sub>, evaporated and residue was purified by silica gel column chromatography using chloroform as the eluant. (15 mg, 34%).<sup>1</sup>H NMR (400 MHz, Chloroform-*d*) δ 8.58 (d, *J* = 16.2 Hz, 2H), 7.74 (d, *J* = 16.2 Hz, 4H), 7.65 (d, *J* = 8.5 Hz, 4H), 7.50 – 7.46 (m, 4H), 7.45 – 7.39 (m, 4H), 7.06 (d, *J* = 8.8 Hz, 4H), 6.81 (d, *J* = 8.8 Hz, 4H), 6.78 – 6.72 (m, 5H), 6.64 (d, *J* = 2.3 Hz, 2H), 6.08 (d, *J* = 16.3 Hz, 2H), 3.89 – 3.83 (m, 18H), 3.81 – 3.72 (m, 8H), 3.71 – 3.64 (m, 8H), 2.99 (m, 8H), 2.81 (m, 8H), 1.60 (s, 8H), 1.37 (s, 16H), 1.30 – 1.19 (m, 32H), 0.88 (t, *J* = 6.8 Hz, 6H).

<sup>13</sup>C NMR (400 MHz, CDCl<sub>3</sub>) δ 161.41, 151.38, 149.74, 147.91, 139.36, 137.09, 133.35, 132.74, 130.48, 130.43, 129.77, 128.00, 125.72, 125.65, 120.96, 119.48, 113.88, 111.97, 111.47, 111.12, 108.51, 98.49, 74.22, 70.75, 69.56, 68.60, 55.28, 52.01, 34.87, 31.39, 31.23, 29.70, 29.56, 29.33, 28.98, 25.90, 14.12. Calcd: 1880.962 [M+Na]<sup>+</sup>, Found: 1880.969 [M+Na]<sup>+</sup>, Δ=3.62 ppm.

## Synthesis of Compound 8:

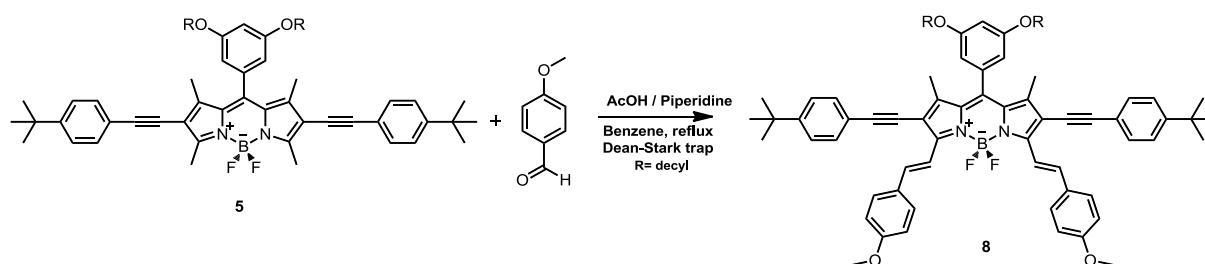

In a 100 mL round-bottomed flask containing 50 mL benzene, Compound 5 (0.053 mmol, 50 mg) and p-anisaldehyde (0.080 mmol, 10.7 mg) piperidine (0.3 mL) and acetic acid (0.3 mL) were added. The mixture was heated under reflux by using a Dean Stark trap and progress of the reaction was monitored by TLC chloroform. When all the starting material had been consumed, the mixture was cooled to room temperature and solvent was evaporated. Water (100 mL) added to the residue and the product was extracted into the chloroform (3 x 100 mL). Organic phase dried over  $\text{Na}_2\text{SO}_4$ , evaporated and residue was purified by silica gel column chromatography using chloroform as the eluant. (34 mg, 55%).  $^1\text{H}$  NMR (400 MHz, Chloroform-*d*)  $\delta$  8.49 (d,  $J = 16.2$  Hz, 2H), 7.77 (d,  $J = 16.3$  Hz, 2H), 7.67 (d,  $J = 8.8$  Hz, 4H), 7.51 – 7.45 (m, 4H), 7.45 – 7.38 (m, 4H), 7.00 (d,  $J = 8.7$  Hz, 4H), 6.62 (t,  $J = 2.3$  Hz, 1H), 6.50 (d,  $J = 2.2$  Hz, 2H), 3.99 (t,  $J = 6.6$  Hz, 4H), 3.90 (s, 6H), 1.81 (m, 10H), 1.54 – 1.28 (m, 46H), 0.91 (m, 6H).  $^{13}\text{C}$  NMR (400 MHz,  $\text{CDCl}_3$ )  $\delta$  161.40, 161.23, 160.72, 152.38, 151.59, 144.61, 138.73, 138.70, 136.44, 132.46, 130.81, 130.49, 130.00, 129.31, 125.54, 116.97, 114.35, 113.78, 106.74, 102.64, 98.52, 98.26, 83.31, 68.51, 55.41, 34.85, 31.92, 31.20, 29.68, 29.65, 29.61, 29.58, 29.40, 29.36, 29.20, 22.69, 14.12, 13.13.

## Synthesis of Compound 2:

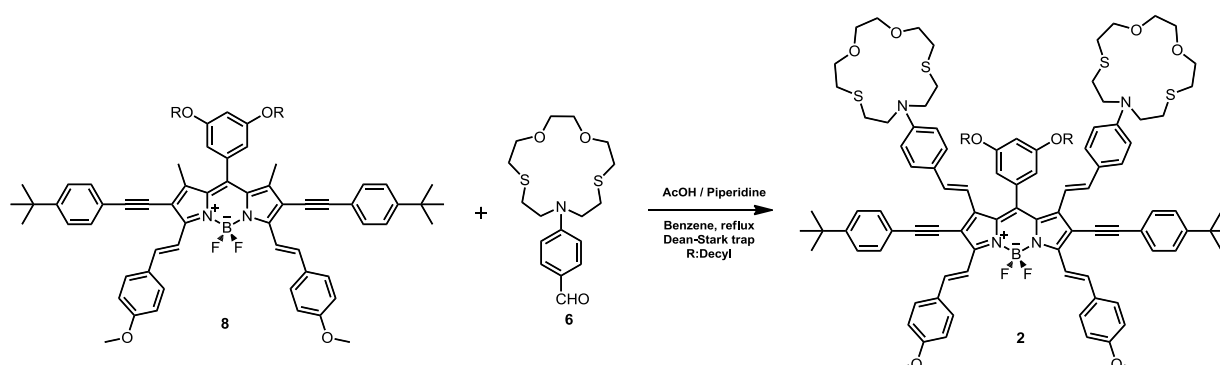

In a 100 mL round-bottomed flask containing 50 mL benzene, Compound **8** (0.021 mmol, 27 mg) and compound **6** (0.124 mmol, 44 mg) piperidine (0.3 mL) and acetic acid (0.3 mL) were added. The mixture was heated under reflux by using a Dean Stark trap and progress of the reaction was monitored by TLC chloroform. When all the starting material had been consumed, the mixture was cooled to room temperature and solvent was evaporated. Water (100 mL) added to the residue and the product was extracted into the chloroform (3 x 100 mL). Organic phase dried over Na<sub>2</sub>SO<sub>4</sub>, evaporated and residue was purified by silica gel column chromatography using chloroform as the eluant. (11 mg, 29%). <sup>1</sup>H NMR (400 MHz, Chloroform-*d*) δ 8.55 (d, *J* = 16.3 Hz, 2H), 7.82 (m, *J* = 22.1, 16.4 Hz, 4H), 7.69 (d, *J* = 8.7 Hz, 4H), 7.49 (d, *J* = 8.4 Hz, 4H), 7.43 (d, *J* = 8.4 Hz, 4H), 7.01 (d, *J* = 8.8 Hz, 8H), 6.82 (s, 1H), 6.66 (d, *J* = 2.3 Hz, 2H), 6.57 (s, 4H), 6.05 (d, *J* = 16.1 Hz, 2H), 3.91-3.63 (m, 34H), 2.98 – 2.90 (m, 8H), 2.84 – 2.75 (m, 8H), 1.63-1.58 (m, 6H), 1.58- 1.18 (m, 44H), 0.91 – 0.80 (m, 6H). <sup>13</sup>C NMR (400 MHz, CDCl<sub>3</sub>) δ 161.60, 161.40, 160.62, 160.58, 153.19, 151.39, 146.95, 142.58, 138.43, 136.97, 134.56, 132.76, 130.87, 130.43, 130.23, 129.22, 128.59, 127.80, 125.66, 125.61, 117.38, 117.13, 114.34, 114.11, 111.64, 108.27, 103.38, 98.47, 86.29, 74.34, 70.78, 70.50, 69.57, 68.71, 55.42, 51.93, 39.22, 34.88, 31.95, 31.27, 31.22, 31.15, 29.74, 29.70, 29.60, 29.40, 29.39, 29.04, 25.94, 22.70, 14.13, 10.96. Calcd: 951.9757 [M+2Na]<sup>+</sup>, Found: 951.9921 [M+2Na]<sup>+</sup>, Δ=17.25 ppm.

### Synthesis of Compound 10:

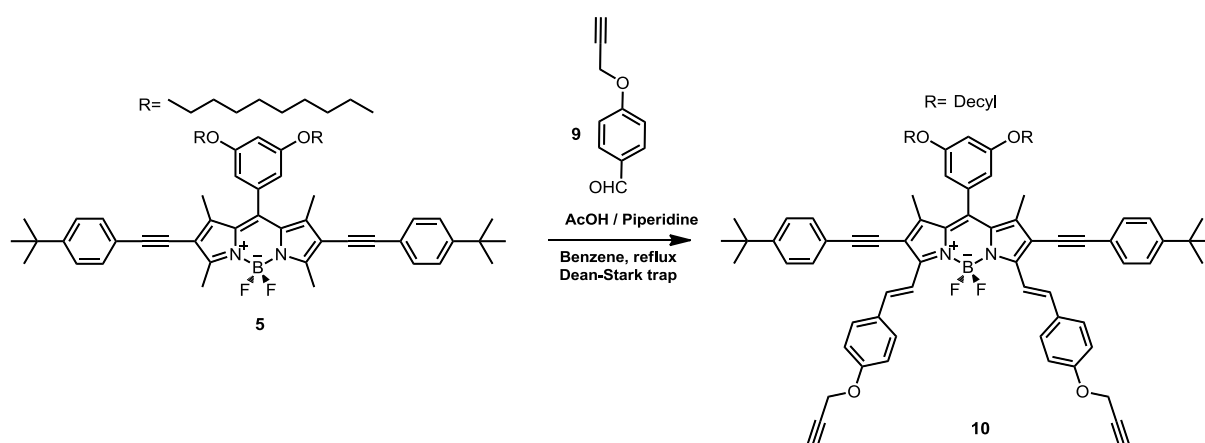

In a 100 mL round-bottomed flask containing 50 mL benzene, Compound **5** (0.12 mmol, 120 mg) and compound **9** (0.25 mmol, 40 mg) piperidine (0.3 mL) and acetic acid (0.3 mL) were

added. The mixture was heated under reflux by using a Dean Stark trap and progress of the reaction was monitored by TLC chloroform. When all the starting material had been consumed, the mixture was cooled to room temperature and solvent was evaporated. Water (100 mL) added to the residue and the product was extracted into the chloroform (3 x 100 mL). Organic phase dried over Na<sub>2</sub>SO<sub>4</sub>, evaporated and residue was used without further purification.

### Synthesis of Compound 11:

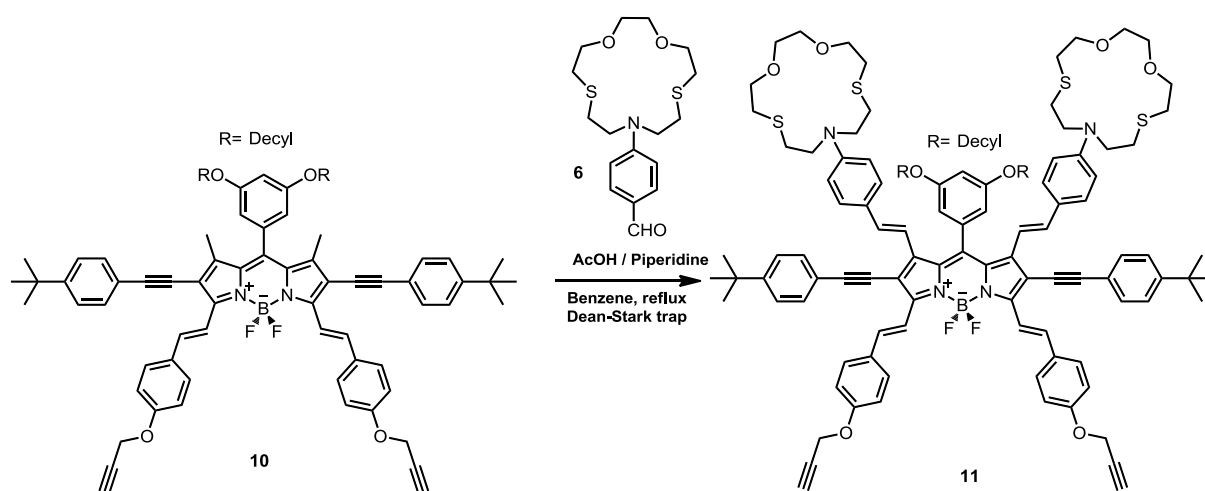

In a 100 mL round-bottomed flask containing 50 mL benzene, Compound **10** (0.081 mmol, 100 mg) and compound **6** (0.24mmol, 86 mg) piperidine (0.3 mL) and acetic acid (0.3 mL) were added. The mixture was heated under reflux by using a Dean Stark trap and progress of the reaction was monitored by TLC 3:1 Chloroform : Hexane. When all the starting material had been consumed, the mixture was cooled to room temperature and solvent was evaporated. Water (100 mL) added to the residue and the product was extracted into the chloroform (3 x 100 mL). Organic phase dried over Na<sub>2</sub>SO<sub>4</sub>, evaporated and residue was purified by silica gel column chromatography using 3:1 CHCl<sub>3</sub> : Hexanes as the eluant. (94mg, 60%). <sup>1</sup>H NMR (400 MHz, Chloroform-*d*) δ 8.54 (d, *J* = 15.9 Hz, 2H), 7.82 (t, *J* = 18.1 Hz, 4H), 7.76 – 7.62 (m, 6H), 7.55 (dd, *J* = 5.7, 3.3 Hz, 2H), 7.52 – 7.46 (m, 2H), 7.43 (d, *J* = 8.5 Hz, 4H), 7.09 (d, *J* = 8.9 Hz, 4H), 7.01 (d, *J* = 8.3 Hz, 4H), 6.82 (s, 1H), 6.65 (d, *J* = 2.3 Hz, 2H), 6.57 (s, 4H), 6.06 (s, 2H), 4.80 (d, *J* = 2.5 Hz, 4H), 4.23 (m, 4H), 3.87 (m, 8H), 3.69 (s, 16H), 2.94 (m, 8H), 2.81 (t, *J* = 5.1 Hz, 8H), 2.60 (t, *J* = 2.4 Hz, 2H), 1.78 (m, 4H), 1.51 - 1.31 (m, 46H), 0.9 (t, *J* = 6.8 Hz, 6H). <sup>13</sup>C NMR (400 MHz, CDCl<sub>3</sub>) δ 169.65, 167.77, 161.60, 158.43, 151.51, 132.82, 132.46, 131.00, 130.88, 130.43, 129.16, 128.80, 128.56,

127.78, 125.70, 120.83, 117.58, 115.28, 115.08, 108.20, 103.42, 98.60, 86.08, 78.36, 75.80, 74.29, 70.78, 68.71, 68.16, 55.89, 52.38, 52.09, 38.73, 34.89, 31.94, 31.36, 31.22, 31.14, 29.70, 29.63, 29.58, 29.37, 29.01, 28.93, 25.92, 23.75, 22.99, 22.71. Calcd: 1928.962 [M+Na]<sup>+</sup>, Found: 1928.968 [M+Na]<sup>+</sup>,  $\Delta$ =3.07 ppm.

### Synthesis of Compound 3:

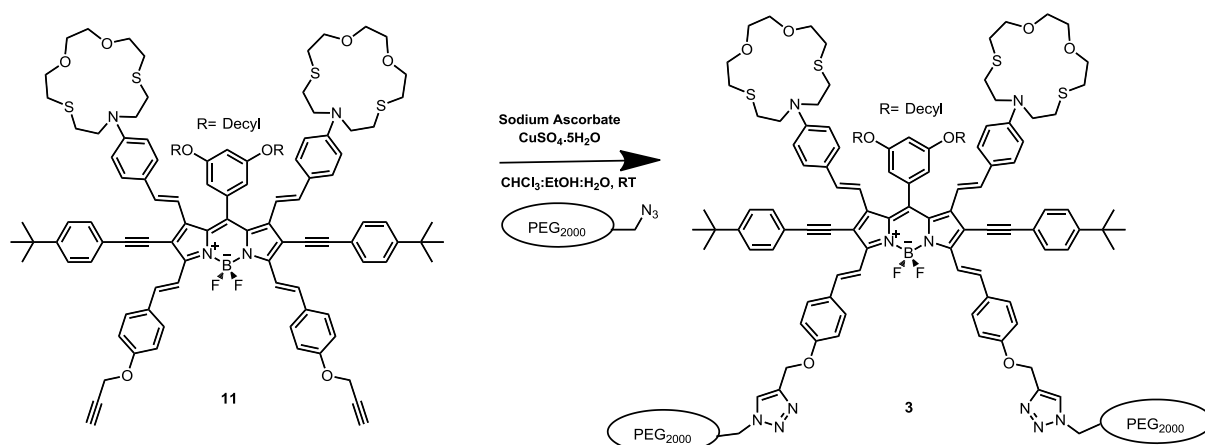

To the solution of the compound **11** (0.017 mmol, 32 mg) in a 6:0.5:0.5 mixture of CHCl<sub>3</sub>, EtOH and water; PEG<sub>2000</sub>-N<sub>3</sub> (0.033 mmol, 67 mg), 0.16 mg sodium ascorbate, 0.1 mg CuSO<sub>4</sub> and 3-4 drop Et<sub>3</sub>N are added and it was stirred at room temperature for 24 h. Water (50 mL) was added to the residue and the product was extracted into the chloroform (3 x 50 mL). (76 mg, 75%). <sup>1</sup>H NMR (400 MHz, Chloroform-*d*)  $\delta$  8.53 (d, *J* = 16.3 Hz, 2H), 7.92 (s, 2H), 7.83 (d, *J* = 8.5 Hz, 2H), 7.81 (d, *J* = 8.5 Hz, 2H), 7.77 – 7.65 (m, 6H), 7.54 (m, 2H), 7.5-7.4 (m, 6H), 7.12 (m, 4H), 6.99 (d, *J* = 8.4 Hz, 4H), 6.81 (s, 1H), 6.64 (s, 2H), 6.54 (s, 2H), 6.04 (d, *J* = 15.9 Hz, 2H), 5.35 (s, 4H), 4.59 (t, *J* = 5.0 Hz, 4H), 4.31 – 4.11 (m, 6H), 3.97 – 3.39 (s, 225H), 2.92 (s, 8H), 2.80 (s, 8H), 2.24 (s, 4H), 1.65 (m, 4H), 1.49 – 1.01 (m, 40H), 1.01 – 0.70 (m, 6H). <sup>13</sup>C NMR (400 MHz, CDCl<sub>3</sub>)  $\delta$  167.73, 161.61, 159.22, 151.45, 147.03, 130.86, 130.61, 130.41, 129.19, 128.80, 128.58, 125.69, 120.88, 115.28, 115.16, 111.71, 108.26, 98.53, 86.22, 74.24, 71.95, 70.58, 68.15, 62.13, 59.03, 51.91, 50.70, 50.42, 38.74, 31.93, 31.92, 31.33, 31.23, 29.69, 29.62, 29.58, 29.36, 29.35, 29.02, 28.92, 25.92, 23.75, 22.97, 22.69, 14.14, 14.03, 10.95. MALDI: Distribution around 6000 with separation of 45 corresponding to ethyleneglycol unit.



### Synthesis of Compound 4:

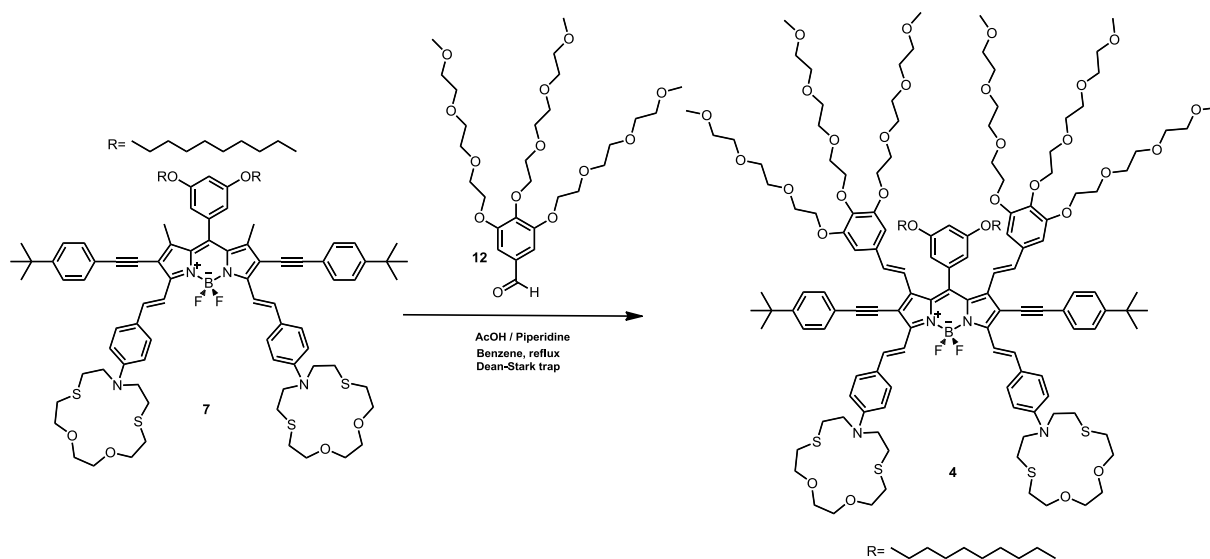

In a 100 mL round-bottomed flask containing 50 mL benzene, Compound 7 (0.092 mmol, 150 mg) and compound 12 (0.27 mmol, 164 mg) piperidine (0.3 mL) and acetic acid (0.3 mL) were added. The mixture was heated under reflux by using a Dean Stark trap and progress of the reaction was monitored by TLC 10% Methanol:Dichloromethane. When all the starting material had been consumed, the mixture was cooled to room temperature and solvent was evaporated. Water (100 mL) added to the residue and the product was extracted into the chloroform (3 x 100 mL). Organic phase dried over Na<sub>2</sub>SO<sub>4</sub>, evaporated and residue was purified by silica gel column chromatography using 10% Methanol:Dichloromethane as the eluant. (87 mg, 34%). <sup>1</sup>H NMR (400 MHz, Chloroform-*d*) δ 8.58 (d, *J* = 16.1 Hz, 2H), 7.71 (d, *J* = 16.1 Hz, 2H), 7.63 (s, 4H), 7.46 (d, *J* = 8.2 Hz, 4H), 7.40 (d, *J* = 8.3 Hz, 4H), 6.74 (d, *J* = 8.4 Hz, 4H), 6.61 (s, 2H), 6.52 (s, 1H), 6.32 (s, 2H), 5.90 (d, *J* = 16.1 Hz, 2H), 5.66 (s, 4H), 4.16 (t, *J* = 5.2 Hz, 6H), 4.10 (s, 10H), 3.84-3.37 (m, 102H), 2.97 (t, *J* = 8.0 Hz, 8H), 2.80 (t, *J* = 5.2 Hz, 8H), 1.47-1.12 (m, 50H), 0.85 (t, *J* = 6.8 Hz, 6H). <sup>13</sup>C NMR (400 MHz, CDCl<sub>3</sub>) δ 160.94, 153.47, 152.71, 151.57, 148.03, 141.34, 139.61, 138.59, 136.88, 135.26, 134.00, 132.83, 130.47, 129.83, 129.29, 128.44, 125.62, 124.03, 120.84, 120.29, 114.63, 112.00, 109.11, 108.12, 105.65, 98.61, 86.24, 74.24, 72.47, 71.98, 70.69, 70.58, 70.55, 69.82, 68.81, 59.00, 52.02, 34.87, 31.91, 31.41, 31.21, 29.61, 29.34, 29.00, 25.80, 22.66, 14.11. Calcd: 2793.4763 [M+Na]<sup>+</sup>, Found: 2793.4909 [M+Na]<sup>+</sup>, Δ=5.23 ppm.

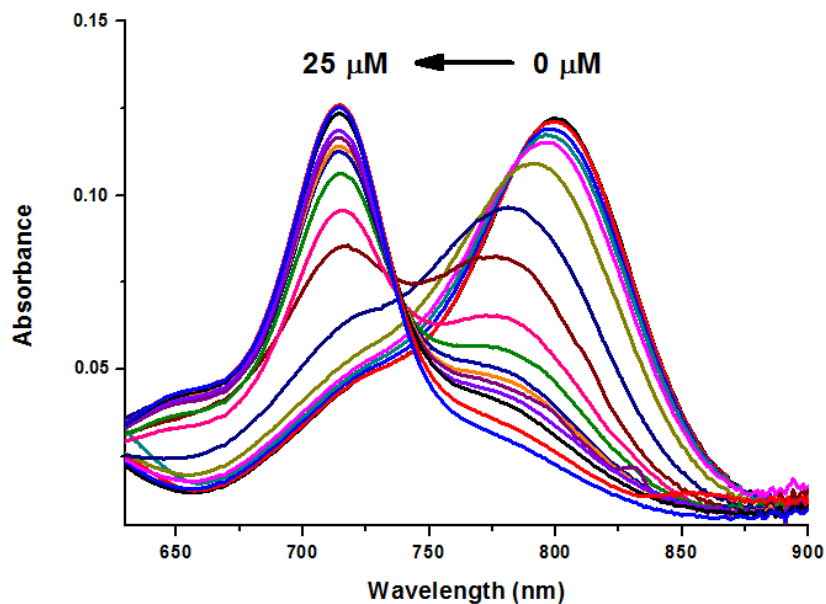

**Figure S1.** Electronic absorption spectra of **1** (0.5  $\mu\text{M}$ ) in the presence of an increasing concentration of  $\text{Hg}^{2+}$  in THF.

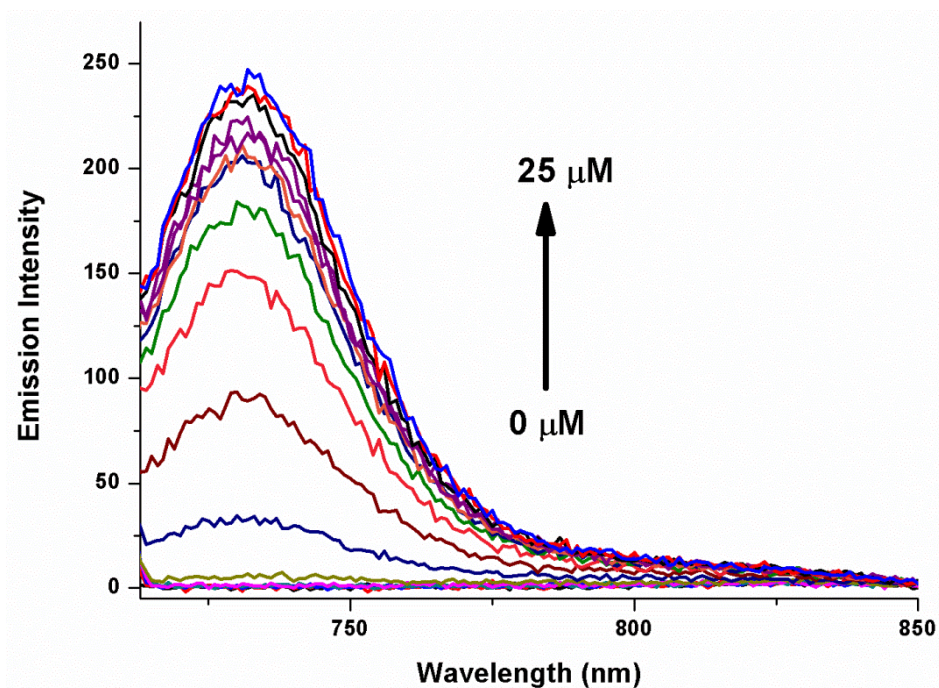

**Figure S2.** Emission spectra of **1** (0.5  $\mu\text{M}$ ), at increasing concentrations of  $\text{Hg}^{2+}$  in THF. Excitation wavelength was 710 nm with a slit width of 5-2.5 nm.

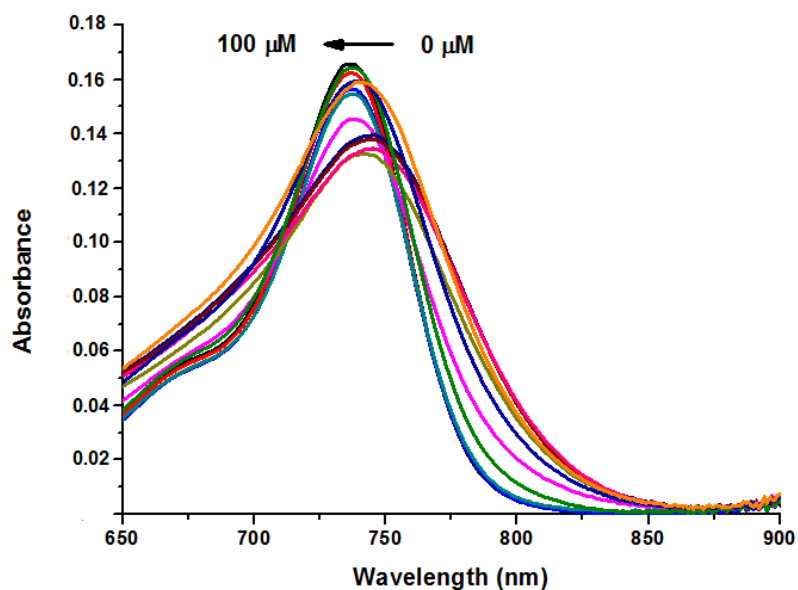

**Figure S3.** Electronic absorption spectra of **2** (1.0  $\mu\text{M}$ ) in the presence of an increasing concentration of  $\text{Hg}^{2+}$  in THF.

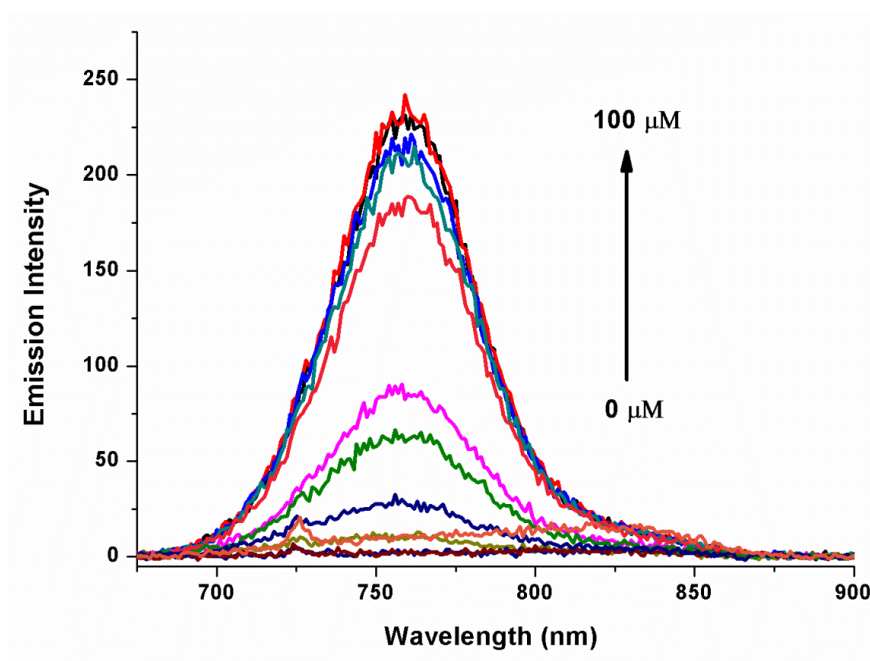

**Figure S4.** Emission spectra of **2** (1.0  $\mu\text{M}$ ), at increasing concentrations of  $\text{Hg}^{2+}$  in THF. Excitation wavelength was 725 nm with a slit width of 5-2.5 nm.

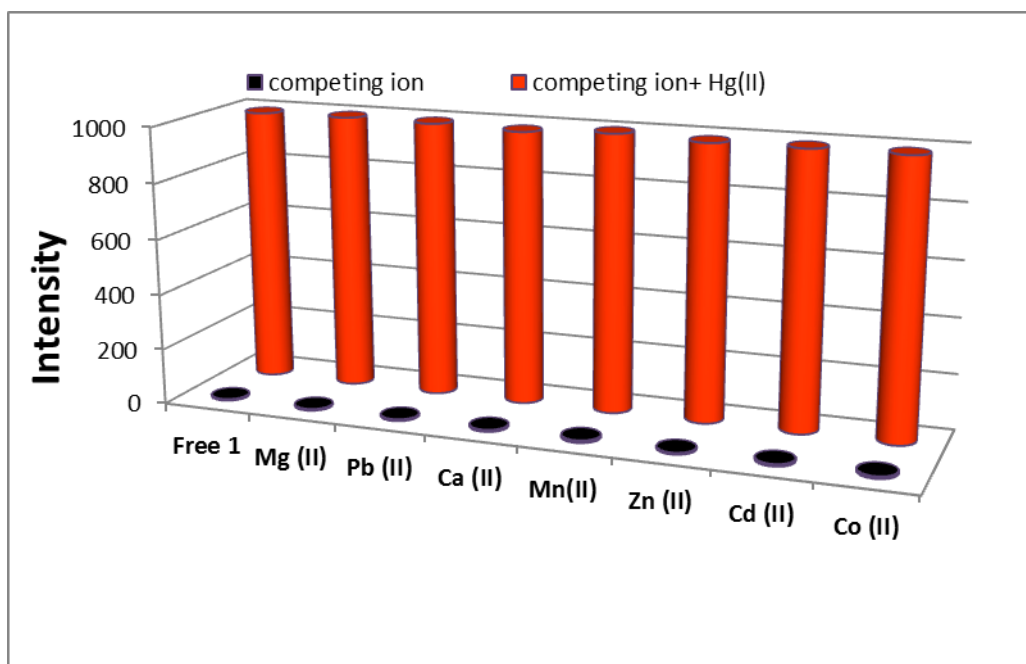

**Figure S5.** Emission intensity response of **1** ( $0.5 \mu\text{M}$ ), with  $5 \mu\text{M}$  of a competing metal ion followed by addition of  $5 \mu\text{M}$   $\text{Hg}^{2+}$  in THF. Excitation wavelength was  $710 \text{ nm}$  with a slit width of  $5\text{-}5 \text{ nm}$ .

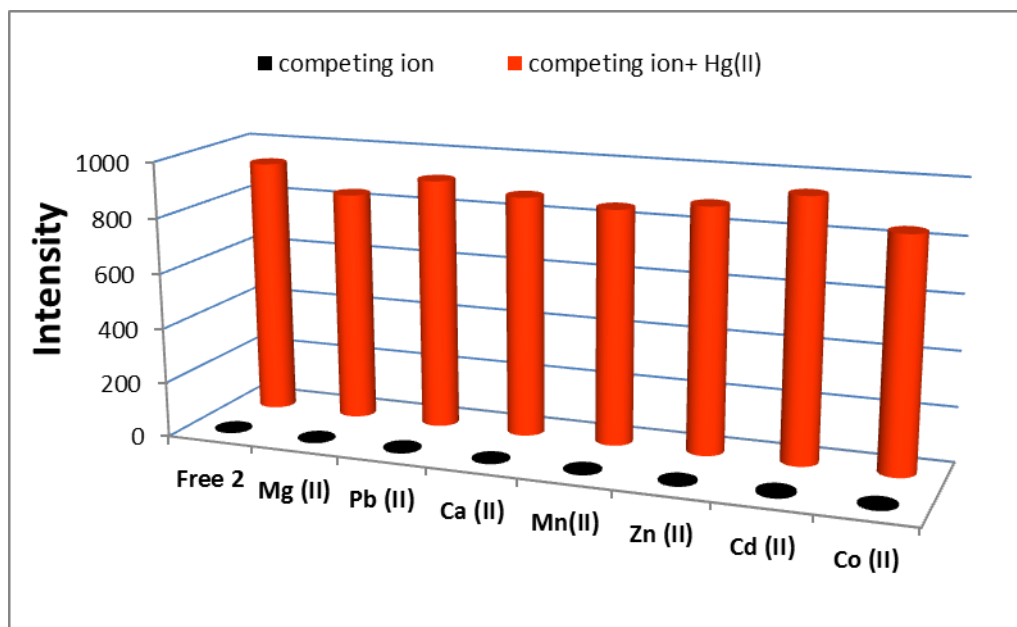

**Figure S6.** Emission intensity response of **2** ( $1.0 \mu\text{M}$ ) with  $10 \mu\text{M}$  of a competing metal ion followed by addition of  $10 \mu\text{M}$   $\text{Hg}^{2+}$  in THF. Excitation wavelength was  $725 \text{ nm}$  with a slit width of  $5\text{-}5 \text{ nm}$ .

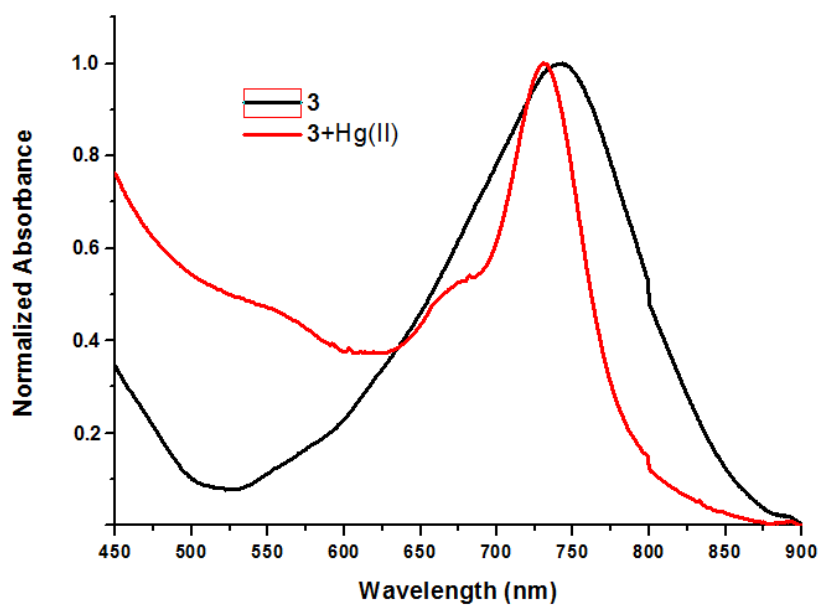

**Figure S7.** The electronic absorption of **3** (1.9  $\mu\text{M}$ ) in presence of excess Hg(II) in 10 mM HEPES:CH<sub>3</sub>CN (50:50, v/v, pH=7.20, 25 °C).

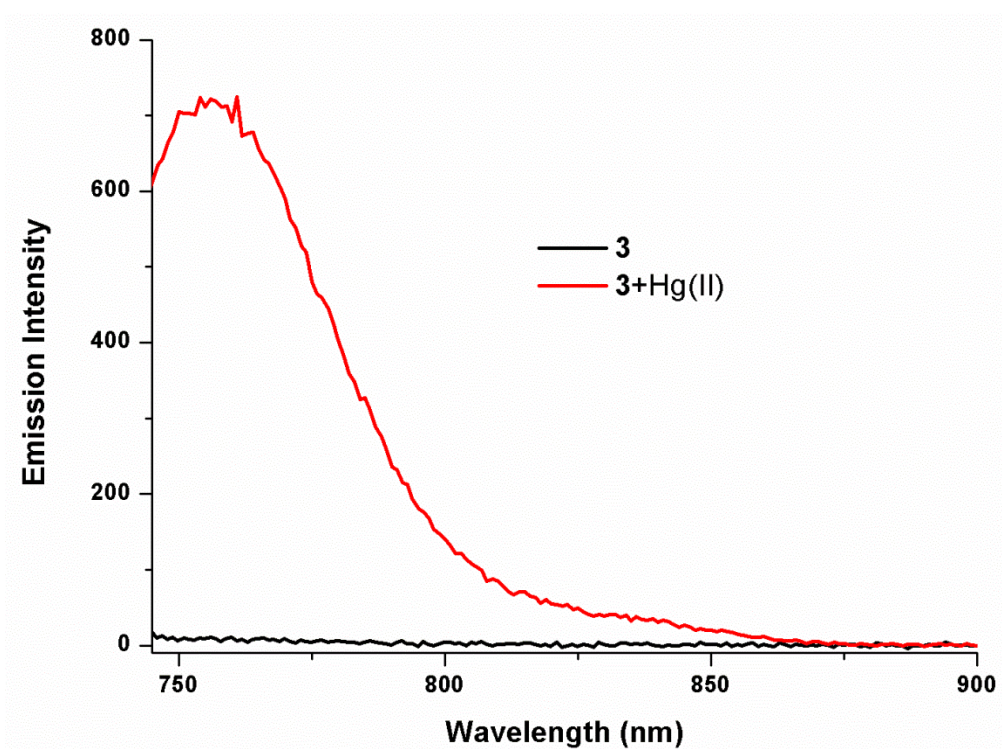

**Figure S8.** Emission spectra (excitation wavelength =730 nm) of **3** (1.9  $\mu\text{M}$ ) in 10 mM HEPES:CH<sub>3</sub>CN (50:50, v/v, pH=7.20, 25 °C).

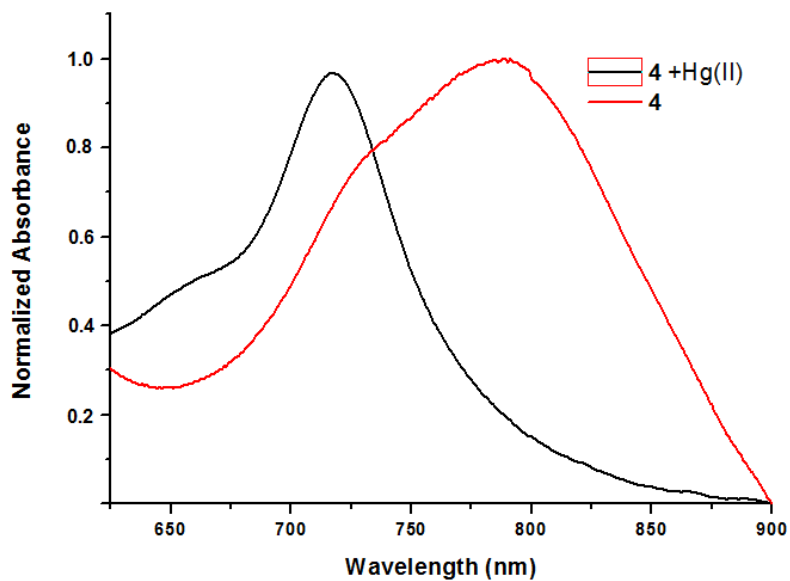

**Figure S9.** The electronic absorption of **4** (2.8  $\mu\text{M}$ ) in presence of excess Hg(II) in 10 mM HEPES:CH<sub>3</sub>CN(50:50, v/v, pH=7.20,25°C).

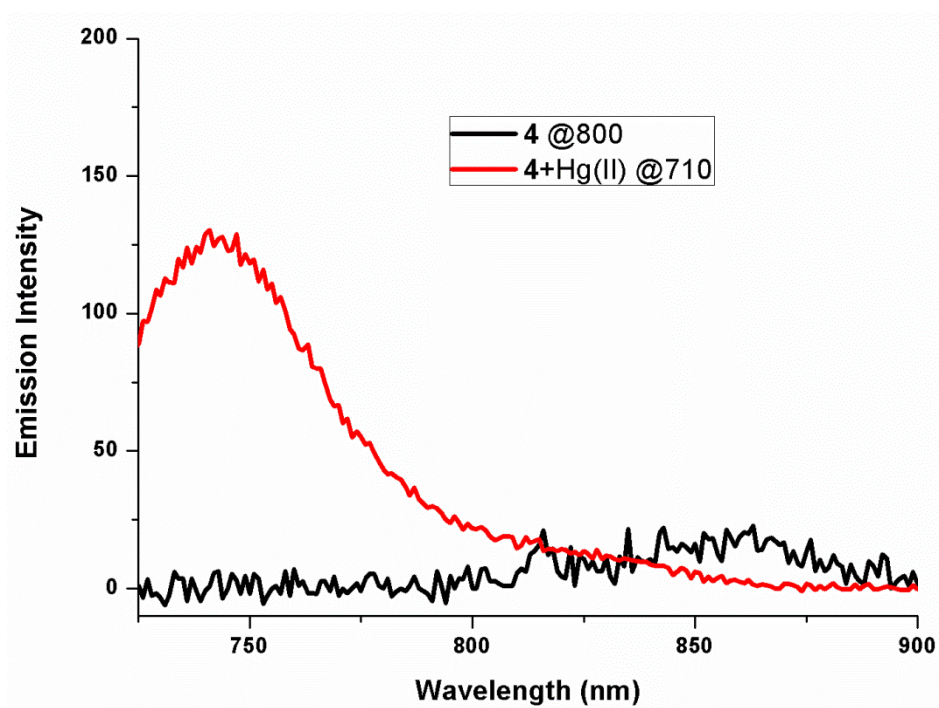

**Figure S10.** Emission spectra of **4** (2.8  $\mu\text{M}$ ) in presence of excess Hg(II) in 10 mM HEPES:CH<sub>3</sub>CN (50:50, v/v, pH=7.20, 25 °C).

**Table S1.** Spectral data for **1**, **2**, **3**, **4**.

| Compound                | $\lambda_{\text{abs}}$ (nm) | $\lambda_{\text{em}}$ (nm) | $\Phi_{\text{f}}$ <sup>[c]</sup> | $\epsilon_{\text{max}}$ <sup>[d]</sup> |
|-------------------------|-----------------------------|----------------------------|----------------------------------|----------------------------------------|
| <b>2</b> <sup>[a]</sup> | 785                         | 745                        | 0.012 <sup>[f]</sup> (730 nm)    | 98900(THF)                             |
| <b>1</b> <sup>[a]</sup> | 824                         | 800                        | 0.022 <sup>[f]</sup> (730 nm)    | 222000(THF)                            |
| <b>3</b> <sup>[b]</sup> | 740                         | -                          | -                                | 50200(Acetonitrile)                    |
| <b>4</b> <sup>[b]</sup> | 825                         | 790                        | 0.007 <sup>[f]</sup>             | 42600(Acetonitrile)                    |

[a] Data acquired in THF in dilute solutions. [b]Data acquired in acetonitrile in dilute solutions. [c]relative quantum yields. [d] unit:  $\text{cm}^{-1}\text{M}^{-1}$ . [f] Reference dye: tetrastaryl compound **2** in reference 3.

**Table S2.** Binding Constants Determined by Isothermal Titration Calorimetry (ITC) for compound **3** and **4**.

| Compound               | K ( $\text{M}^{-1}$ )                   | $\Delta\text{H}$ (kcal/mol)              | $\Delta\text{S}$ cal/(mol · K) | model             |
|------------------------|-----------------------------------------|------------------------------------------|--------------------------------|-------------------|
| <b>3 (1:1 binding)</b> | $(7.15 \pm 1.95) \times 10^5$           | $-1.82 \times 10^4 \pm 1.03 \times 10^3$ | -34.2                          | One set of sites  |
| <b>3 (1:2 binding)</b> | $4.43 \times 10^4 \pm 6.90 \times 10^3$ | -8288 $\pm$ 514                          | -6.53                          | Two sets of sites |
| <b>4 (1:1 binding)</b> | $(7.23 \pm 1.41) \times 10^6$           | $-2.64 \times 10^4 \pm 682$              | -57.4                          | One set of sites  |
| <b>4 (1:2 binding)</b> | $2.0 \times 10^5 \pm 2.5 \times 10^4$   | $-1.27 \times 10^4 \pm 285$              | -18.6                          | Two sets of sites |



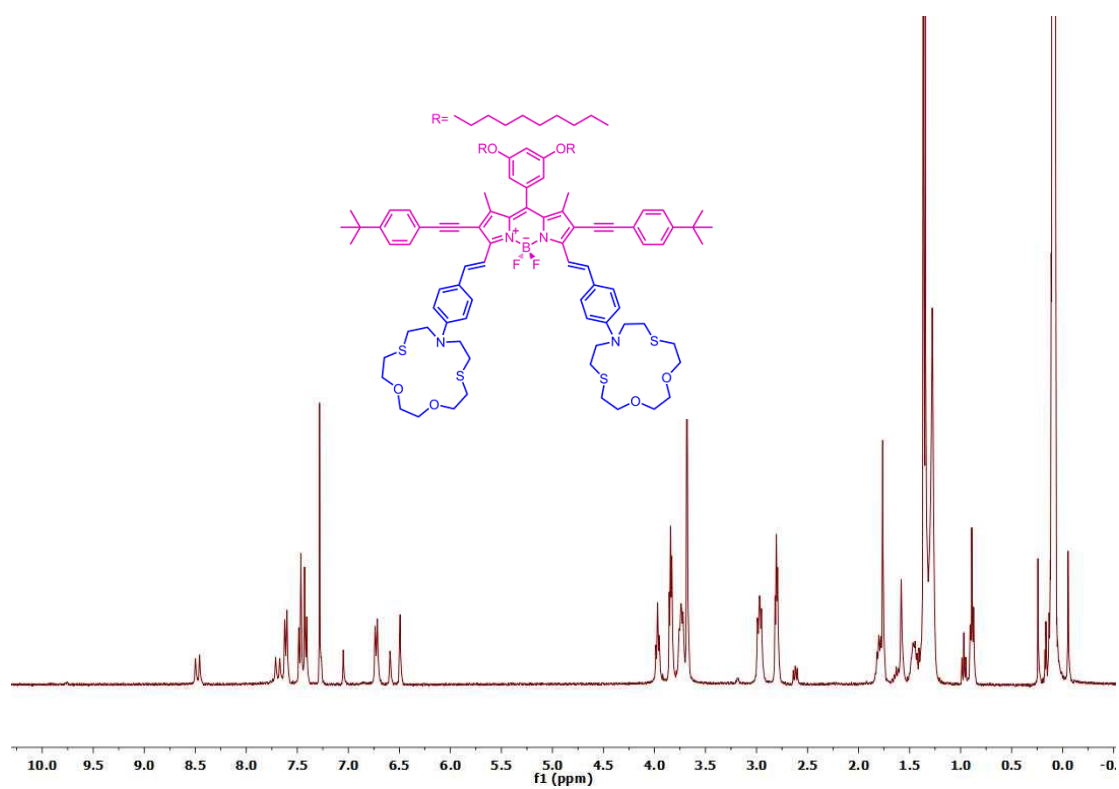

**Figure S11.**  $^1\text{H}$  NMR spectrum of compound **7**

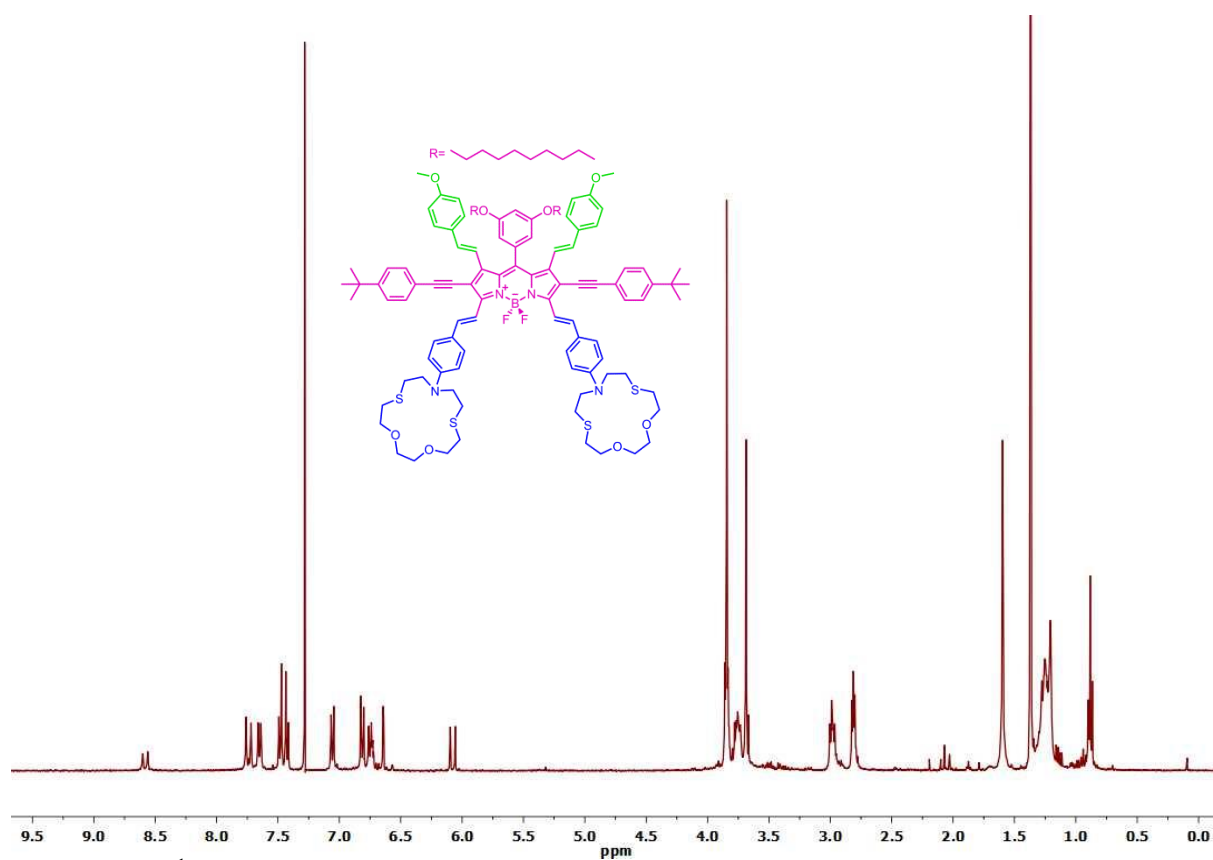

**Figure S12.**  $^1\text{H}$  NMR spectrum of compound **1**



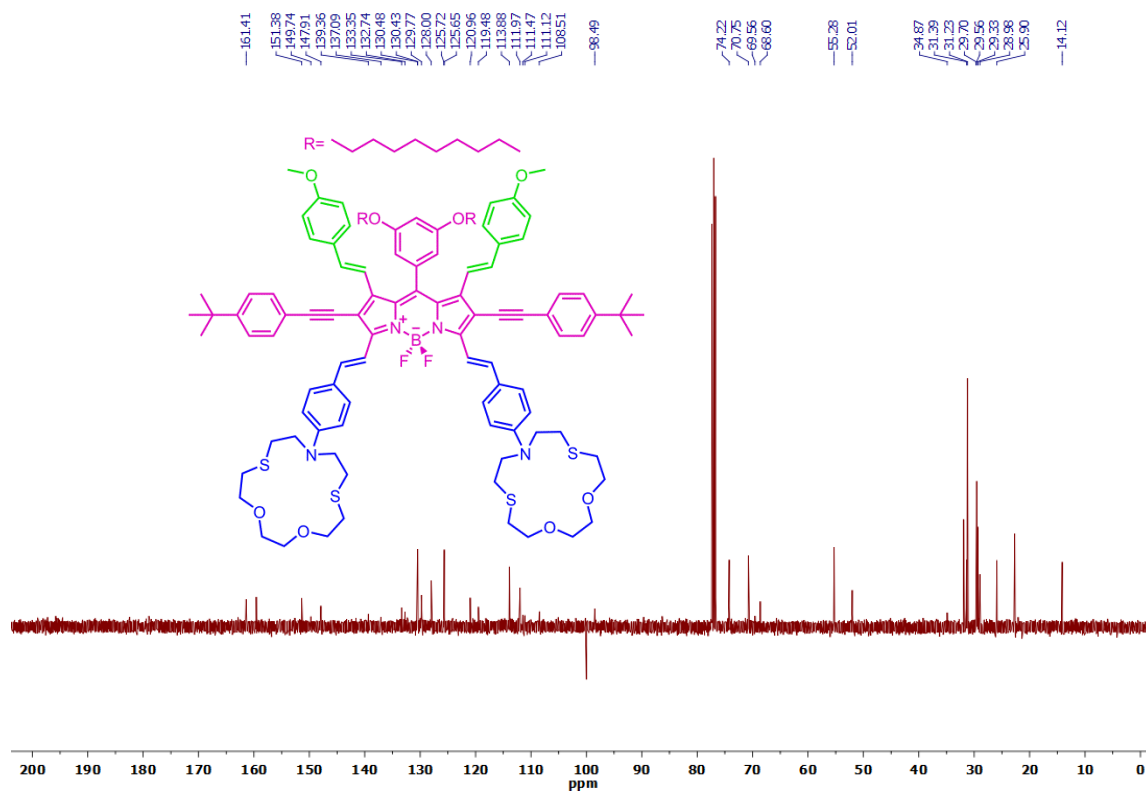

Figure S13.  $^{13}\text{C}$  NMR spectrum of compound **1**

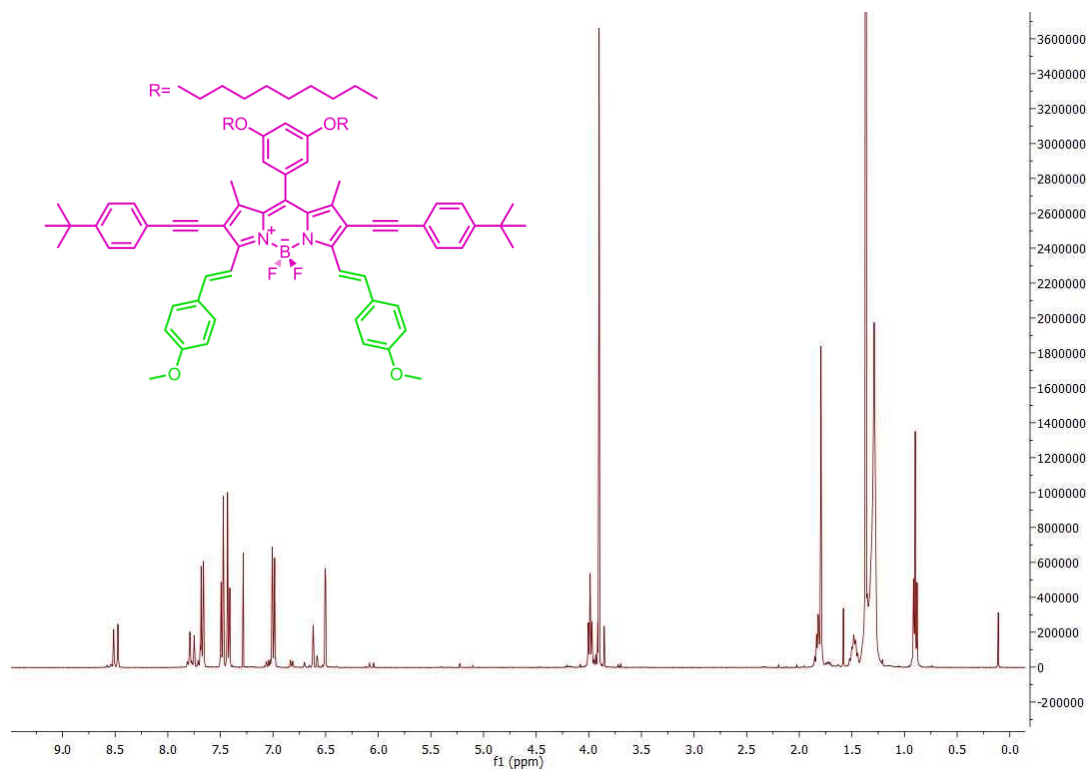

Figure S14.  $^1\text{H}$  NMR spectrum of compound **8**



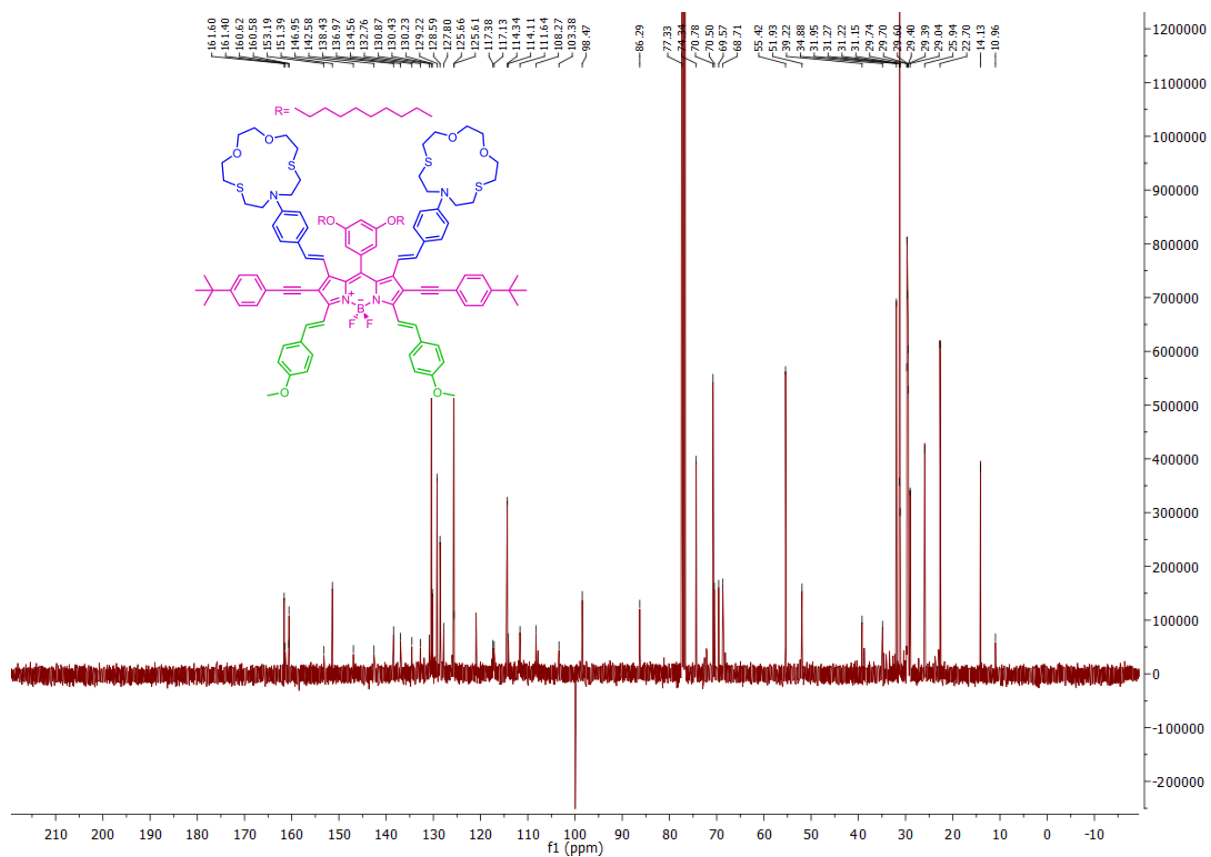

**Figure S17.** <sup>13</sup>C NMR spectrum of compound 2

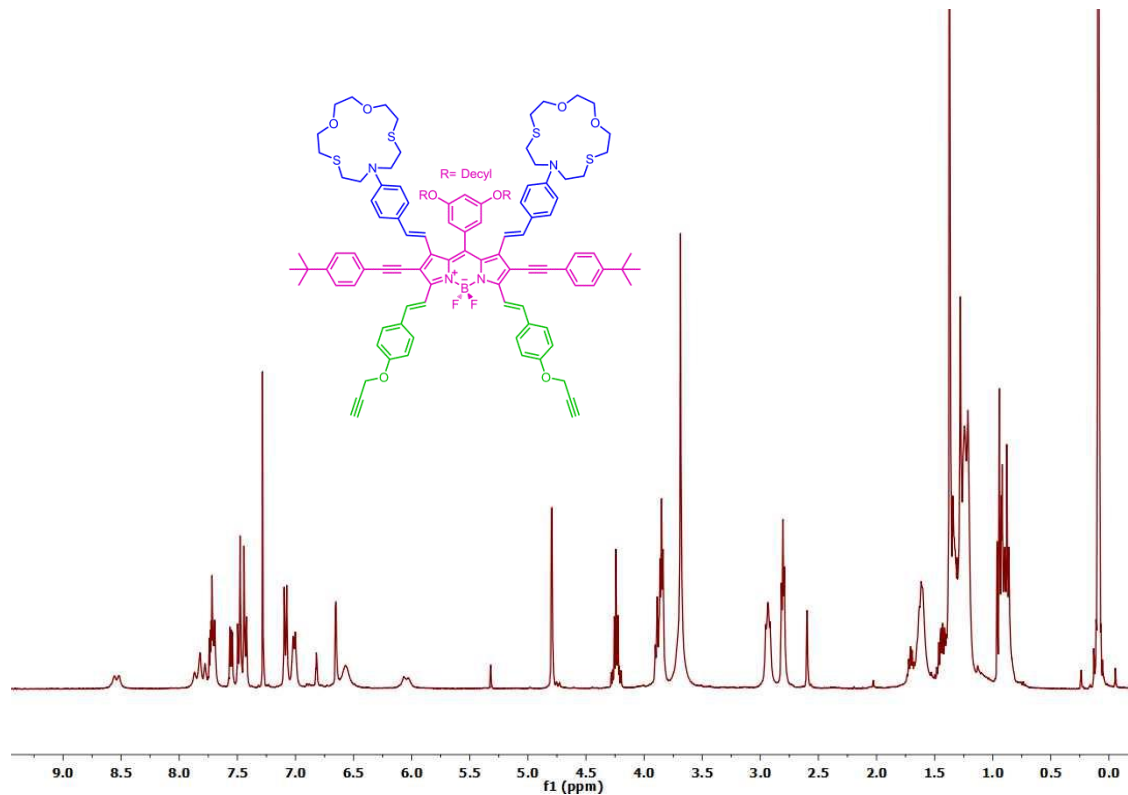

**Figure S18.** <sup>1</sup>H NMR spectrum of compound 11

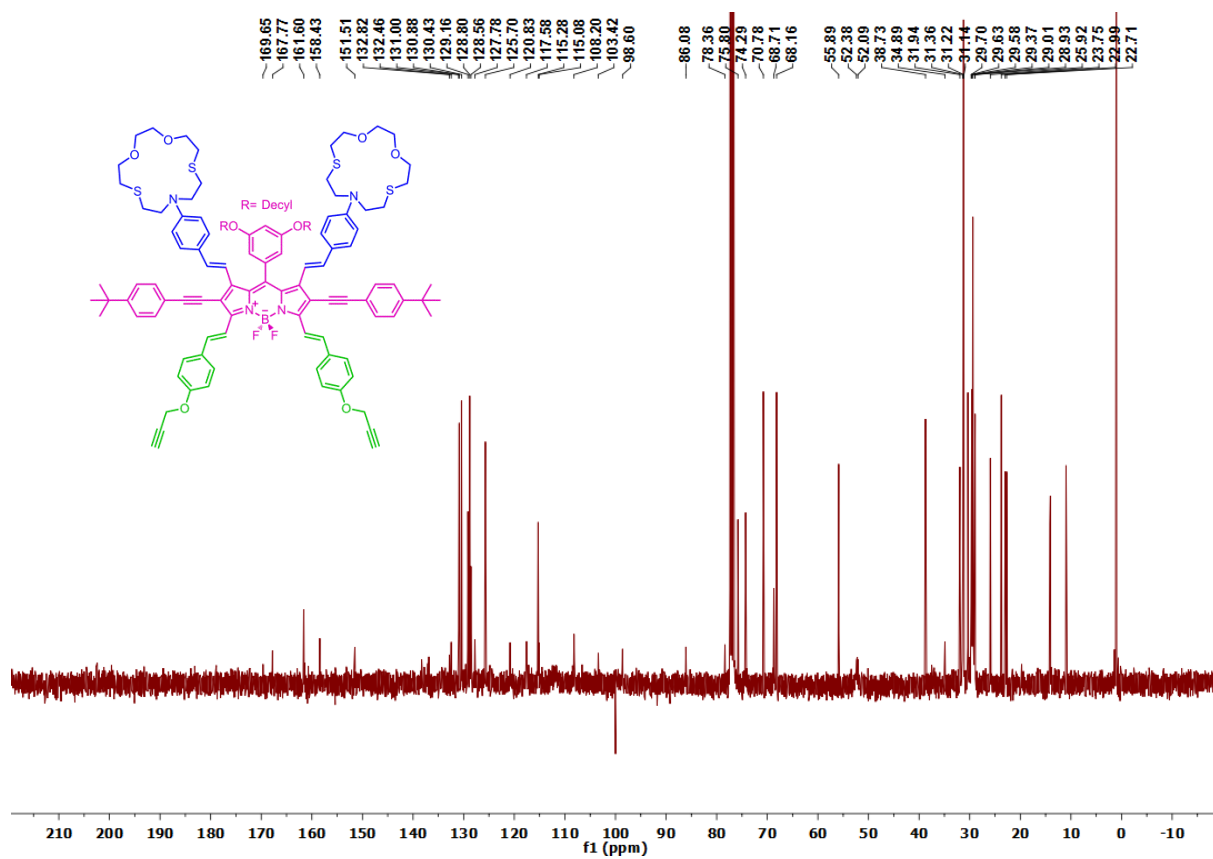

**Figure S19.**  $^{13}\text{C}$  NMR spectrum of compound 11

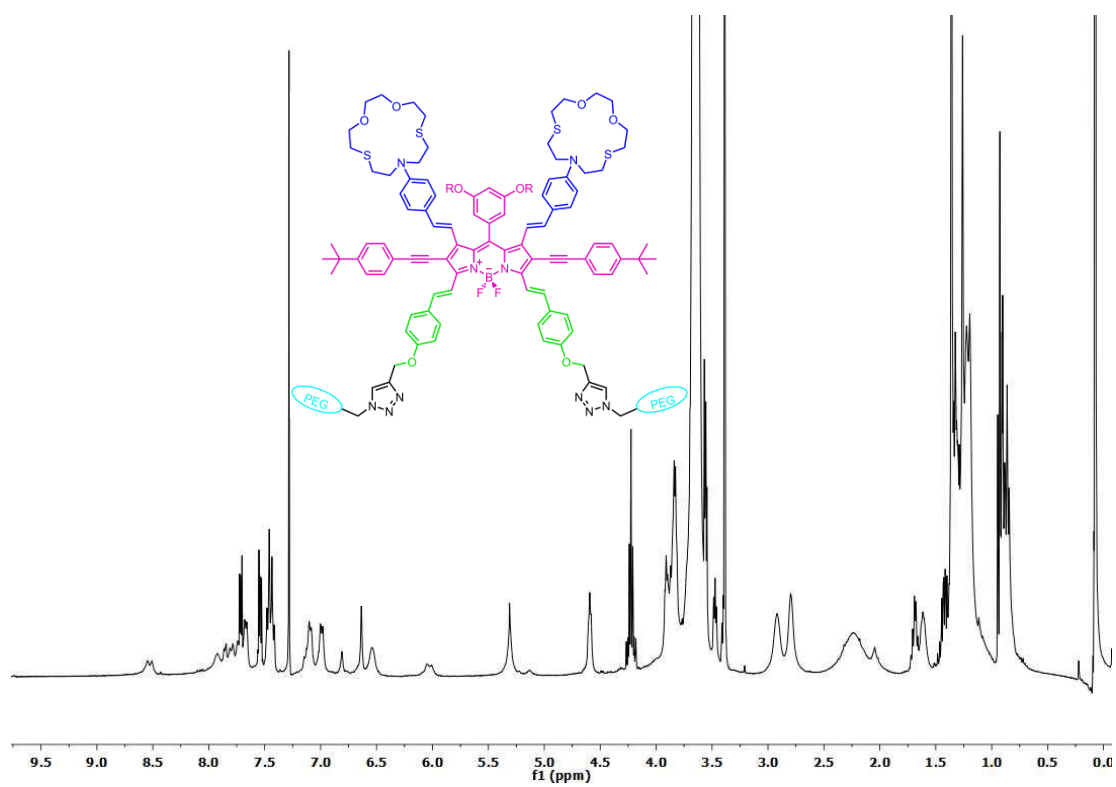

**Figure S20.**  $^1\text{H}$  NMR spectrum of compound 3

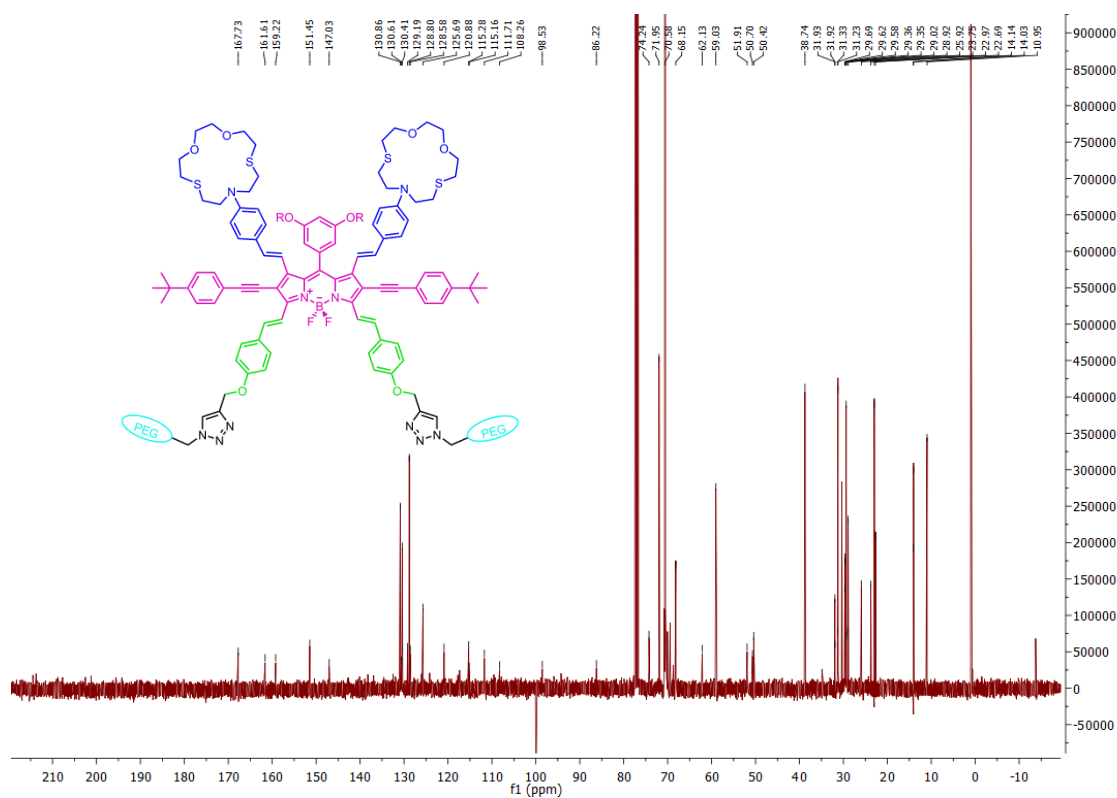

Figure S21. <sup>13</sup>C NMR spectrum of compound 3

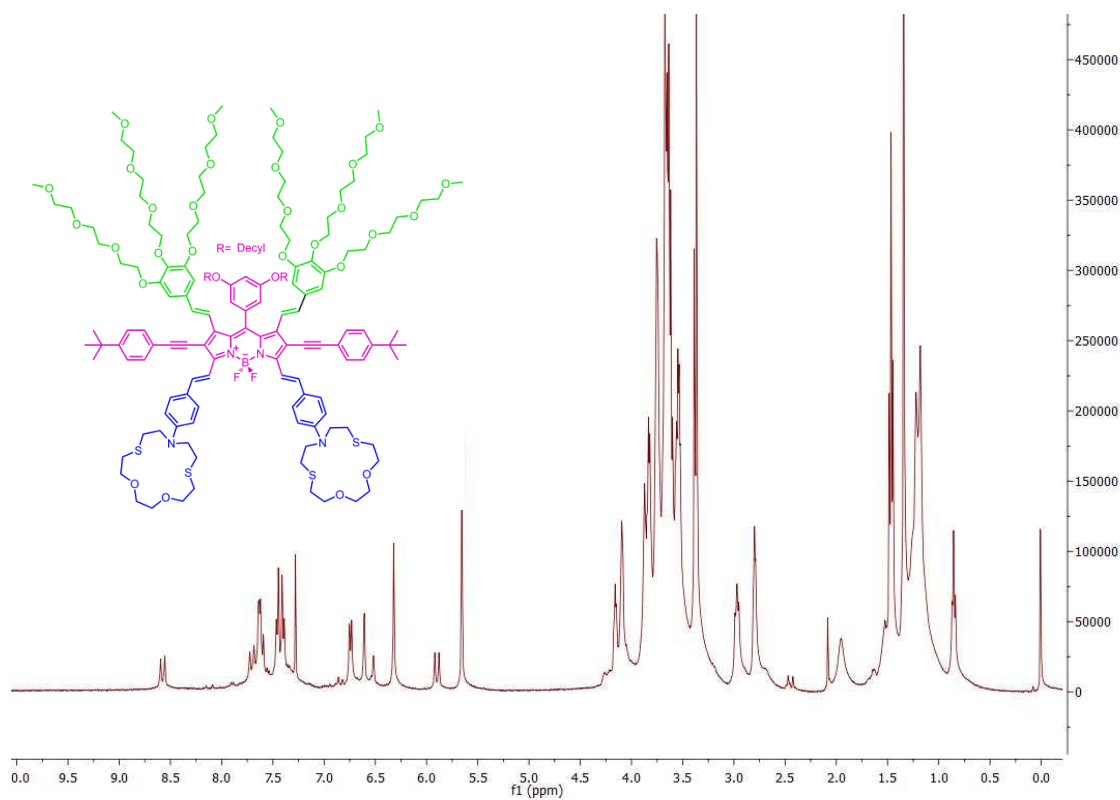

Figure S22. <sup>1</sup>H NMR spectrum of compound 4

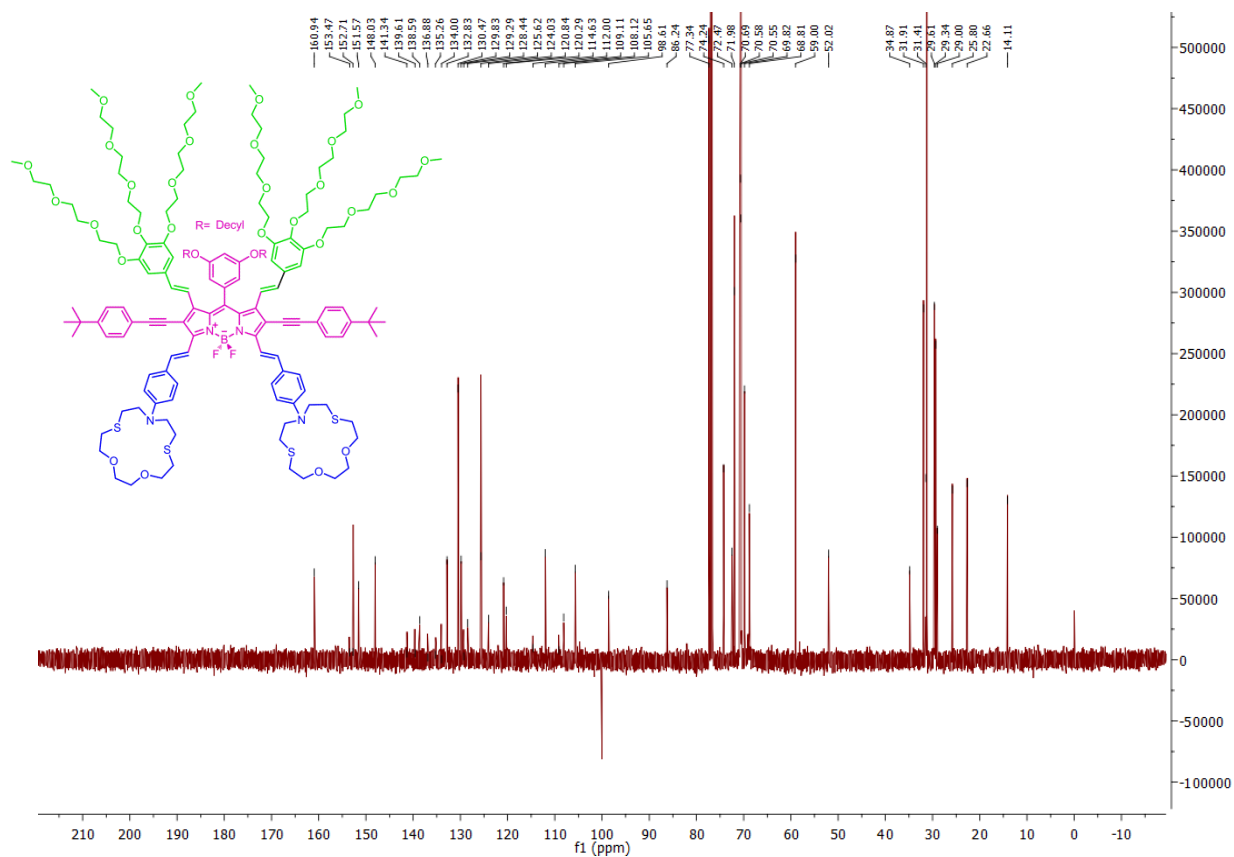

**Figure S23.**  $^{13}\text{C}$  NMR spectrum of compound **4**

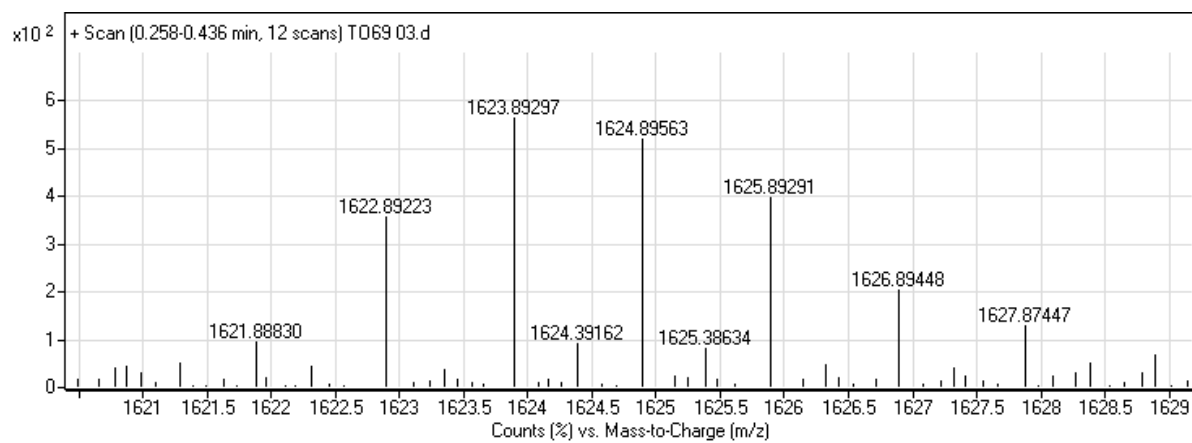

**Figure S24.** Mass Spectrum of **7**

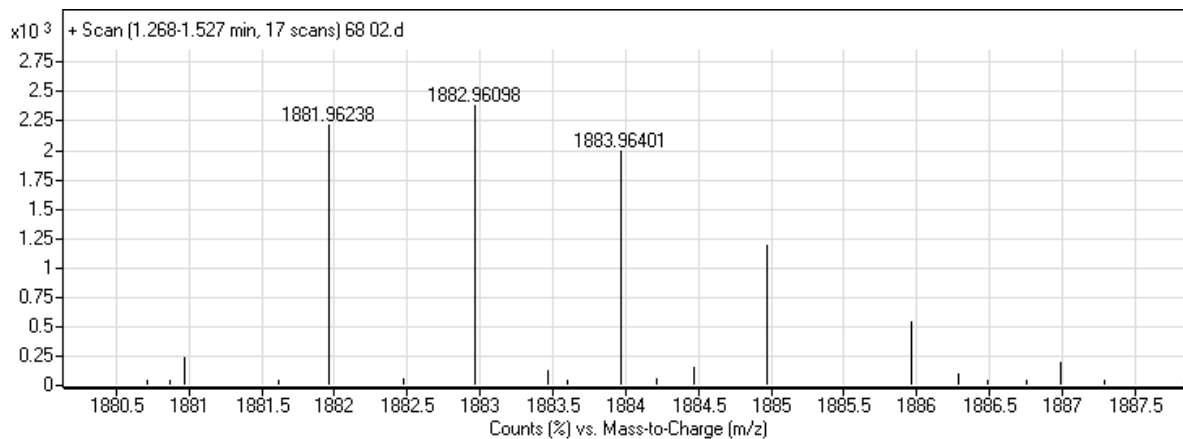

**Figure S25.** Mass Spectrum of **1**

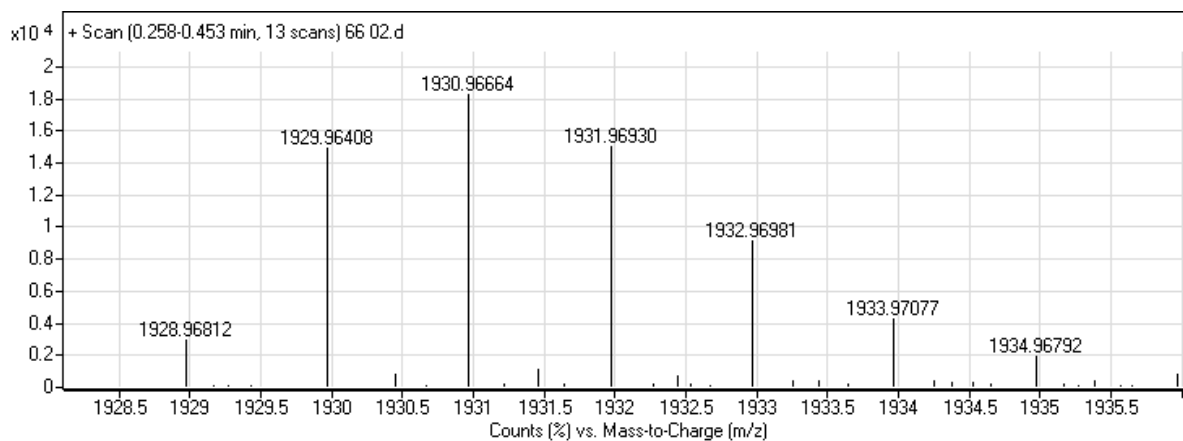

**Figure S26.** Mass Spectrum of **11**





## Computational Details

Density Functional Theory employing the unrestricted B3LYP<sup>5,6</sup> hybrid functional is used throughout. Geometries were fully optimized with CEP-31G basis<sup>7</sup>. The choice of basis can be justified considering the system size and extensive benchmarking from literature<sup>8</sup>. Excitation energy and characteristics were probed via TDDFT. Solvent environment was treated as a dielectric medium ( $\epsilon_{\text{THF}}=7.43$ ) using polarizable continuum model (PCM) as implemented in Gaussian03. No restrictions on symmetry were imposed.

Styryl derivatives of Bodipy were modelled to study the effect of position of charge injection on the HOMO-LUMO gap. These species were optimized using Pople's all electron 6-31G<sup>9</sup> basis including d-type polarization functions. Vibrational frequencies (all positive) confirmed the species to be true minima. Single point energy refinements were performed using Dunning type triple- $\zeta$  basis (cc-pVTZ)<sup>10</sup>. All molecular orbitals are plotted at an isosurface value of 0.04 A.U. All calculations were carried out with Gaussian 03 (D.01).<sup>10</sup>

We are grateful to TUBITAK ULAKBIM (TR-Grid infrastructure) and to Gazi University Physics Department (pizag cluster) for computing resources.

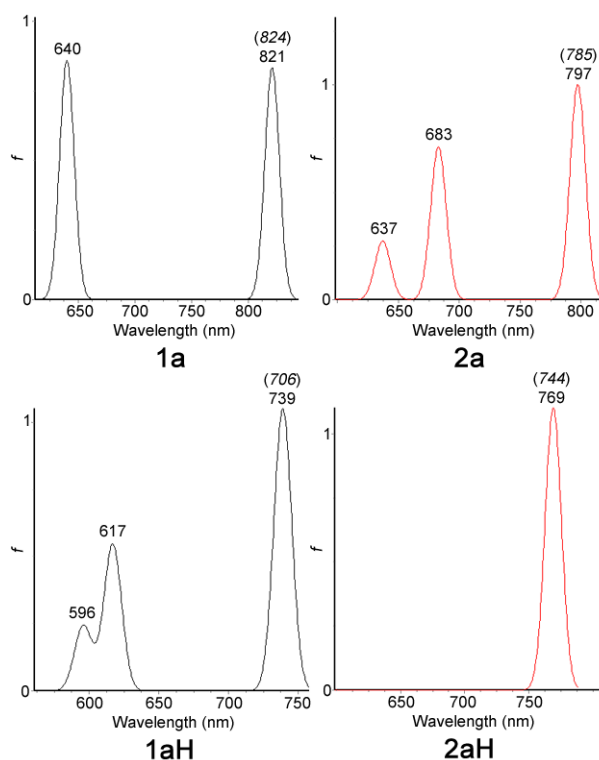

**Figure S30.** Computed absorption spectra. (Experimental values in parentheses)

**Table S3.** Summary of TDDFT Results <sup>a</sup>

| Species    | Major transitions & orbital contributions | $\Delta E$ (eV) | $\lambda^{\text{COMP}}$ (nm) | $\lambda^{\text{EXP}}$ (nm) | Oscillator strength |       |
|------------|-------------------------------------------|-----------------|------------------------------|-----------------------------|---------------------|-------|
| <b>1a</b>  | 237A→238A                                 | 0.625           | 1.51                         | 821                         | 798                 | 1.103 |
|            | 236A→238A                                 | 0.665           | 1.94                         | 640                         | 584                 | 1.137 |
|            | 237A→240A                                 | 0.675           | 2.85                         | 436                         | 470                 | 1.325 |
| <b>1aH</b> | 237A→238A                                 | 0.621           | 1.68                         | 739                         | 706                 | 1.185 |
| <b>2a</b>  | 237A→238A                                 | 0.629           | 1.56                         | 797                         | 740                 | 1.141 |
|            | 236A→238A                                 | 0.670           | 1.82                         | 683                         | -                   | 0.811 |
|            | 232A→238A                                 | -0.369          |                              |                             |                     |       |
|            | 237A→239A                                 | 0.466           | 2.90                         | 427                         | 403                 | 0.820 |
|            | 237A→240A                                 | -0.274          |                              |                             |                     |       |
| <b>2aH</b> | 237A→238A                                 | 0.615           | 1.61                         | 769                         | 744                 | 1.132 |
|            | 236A→238A                                 | 0.662           | 2.22                         | 558                         | -                   | 0.911 |
|            | 237A→239A                                 | 0.579           | 2.71                         | 458                         | 410                 | 0.709 |
|            | 234A→238A                                 | 0.329           |                              |                             |                     |       |
|            | 237A→241A                                 | 0.616           | 3.24                         | 382                         | -                   | 0.918 |

<sup>a</sup> Experimental values belong to **1** and **2**.

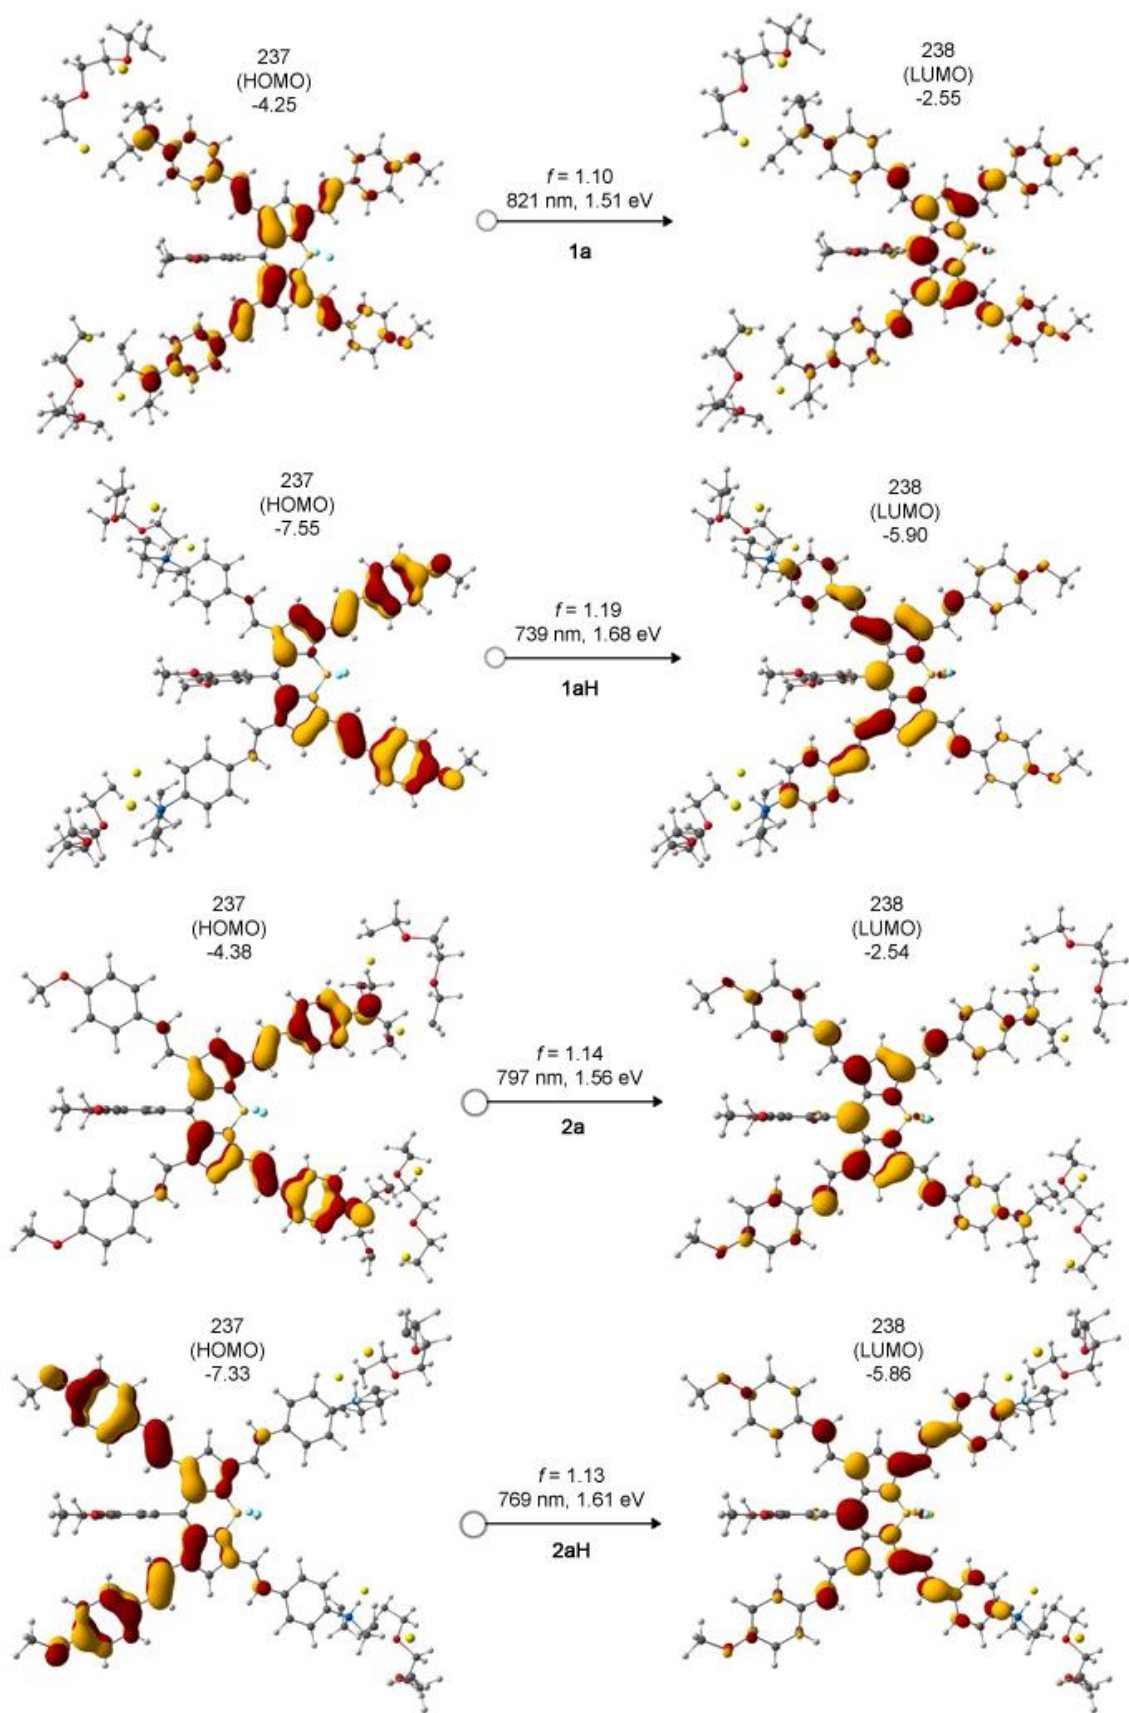

**Figure S31.** MO plots and energies (eV) for transitions with high oscillator strength.

## Cartesian Coordinates and Total Energies

1a, UB3LYP/CEP-31G, Electronic State = S<sub>0</sub>, E=-707.9093312 A.U.

|   | x(Å)      | y(Å)      | z(Å)      |
|---|-----------|-----------|-----------|
| C | -0.417031 | 0.852985  | 1.411775  |
| C | -0.782050 | -0.332418 | 2.127373  |
| C | -0.977879 | -1.387782 | 1.195506  |
| C | -0.713944 | -0.813766 | -0.132423 |
| N | -0.384896 | 0.551240  | 0.051734  |
| B | -0.092105 | 1.554735  | -1.078979 |
| N | -0.159903 | 0.809316  | -2.424539 |
| C | -0.435839 | -0.570974 | -2.580198 |
| C | -0.364671 | -0.876418 | -4.016878 |
| C | -0.058351 | 0.350259  | -4.666329 |
| C | 0.063663  | 1.378306  | -3.676773 |
| C | -1.375368 | -2.766875 | 1.522571  |
| C | -1.531985 | -3.236671 | 2.809528  |
| C | -1.950773 | -4.600284 | 3.210853  |
| C | -2.033452 | -4.909838 | 4.611818  |
| C | -2.430973 | -6.187305 | 5.065970  |
| C | -2.761433 | -7.199103 | 4.119050  |
| C | -2.688640 | -6.923256 | 2.720103  |
| C | -2.286792 | -5.636146 | 2.279692  |
| O | -3.149587 | -8.437308 | 4.667004  |
| C | -0.100253 | 2.183398  | 1.918511  |
| C | -0.177970 | 2.535109  | 3.254164  |
| C | 0.156139  | 3.851148  | 3.825855  |
| C | -0.027857 | 4.083319  | 5.229131  |
| C | 0.276284  | 5.324121  | 5.831673  |
| C | 0.803232  | 6.414419  | 5.051684  |
| C | 0.986096  | 6.184394  | 3.637036  |
| C | 0.672647  | 4.943200  | 3.048679  |
| N | 1.134748  | 7.651838  | 5.640242  |
| C | 0.357561  | 2.797307  | -3.843037 |
| C | 0.609209  | 3.389403  | -5.067740 |
| C | 0.892734  | 4.815564  | -5.302873 |
| C | 0.902563  | 5.805507  | -4.261245 |
| C | 1.180601  | 7.159303  | -4.532008 |
| C | 1.462325  | 7.617045  | -5.872691 |
| C | 1.456943  | 6.625656  | -6.918934 |
| C | 1.174846  | 5.271090  | -6.632381 |
| N | 1.720000  | 8.976310  | -6.141329 |
| C | -0.553092 | -2.179485 | -4.674934 |
| C | -0.547597 | -2.358276 | -6.042163 |
| C | -0.704067 | -3.640171 | -6.768864 |

|   |           |           |            |
|---|-----------|-----------|------------|
| C | -0.844053 | -4.910137 | -6.120481  |
| C | -0.984558 | -6.108660 | -6.866023  |
| C | -0.987961 | -6.055538 | -8.292703  |
| C | -0.851365 | -4.805437 | -8.962240  |
| C | -0.710744 | -3.620437 | -8.205815  |
| O | -1.118469 | -7.179809 | -9.131182  |
| H | -0.890585 | -0.398201 | 3.203653   |
| H | 0.074708  | 0.495688  | -5.731986  |
| H | -1.562612 | -3.439615 | 0.691369   |
| H | -1.330467 | -2.558911 | 3.646009   |
| H | -1.782644 | -4.136604 | 5.343069   |
| H | -2.493998 | -6.421533 | 6.129282   |
| H | -2.941490 | -7.686012 | 1.982722   |
| H | -2.241090 | -5.441755 | 1.206633   |
| H | 0.215116  | 2.914786  | 1.176902   |
| H | -0.518743 | 1.786062  | 3.978522   |
| H | -0.415741 | 3.273809  | 5.854763   |
| H | 0.125596  | 5.435305  | 6.904379   |
| H | 1.364607  | 6.977355  | 2.992531   |
| H | 0.830347  | 4.821132  | 1.975579   |
| H | 0.369682  | 3.394190  | -2.933114  |
| H | 0.604966  | 2.762784  | -5.967318  |
| H | 0.683550  | 5.514720  | -3.232216  |
| H | 1.157953  | 7.866187  | -3.704340  |
| H | 1.678286  | 6.901903  | -7.949403  |
| H | 1.179667  | 4.546428  | -7.452192  |
| H | -0.692894 | -3.043234 | -4.032299  |
| H | -0.422046 | -1.482285 | -6.687608  |
| H | -0.838450 | -4.969970 | -5.030692  |
| H | -1.083627 | -7.057871 | -6.338184  |
| H | -0.856138 | -4.789922 | -10.052748 |
| H | -0.604345 | -2.664196 | -8.725243  |
| C | -1.241654 | -8.498883 | -8.511038  |
| C | -0.727392 | -1.382994 | -1.442067  |
| C | 0.855658  | 7.932117  | 7.077769   |
| C | -0.660049 | 8.139374  | 7.365066   |
| S | -1.033230 | 8.914283  | 9.082366   |
| C | -0.025246 | 7.856456  | 10.318523  |
| C | 1.228478  | 8.592738  | 10.838510  |
| O | 2.223537  | 8.660368  | 9.760843   |
| C | 3.102728  | 9.833860  | 9.781918   |
| C | 2.440601  | 11.105080 | 9.208495   |
| O | 2.407589  | 11.019390 | 7.740786   |
| C | 1.803403  | 12.216896 | 7.142116   |
| C | 1.770500  | 12.069195 | 5.607646   |
| S | 0.308960  | 11.007807 | 4.969052   |

|   |           |           |           |
|---|-----------|-----------|-----------|
| C | 1.241186  | 9.638238  | 4.016405  |
| C | 1.996193  | 8.615275  | 4.914567  |
| C | 1.773587  | 9.989942  | -5.048561 |
| C | 3.066484  | 9.883622  | -4.188923 |
| S | 3.384658  | 11.407839 | -3.061629 |
| C | 1.709738  | 11.721867 | -2.190195 |
| C | 0.967481  | 12.948887 | -2.763355 |
| O | 0.460188  | 12.620236 | -4.101736 |
| C | 0.383437  | 13.740598 | -5.044860 |
| C | 1.742170  | 14.090541 | -5.688711 |
| O | 2.067569  | 13.089704 | -6.715923 |
| C | 3.354907  | 13.374410 | -7.363275 |
| C | 3.647467  | 12.300315 | -8.430662 |
| S | 4.364854  | 10.674850 | -7.713907 |
| C | 1.697425  | 9.480649  | -7.534239 |
| C | 3.056721  | 9.405969  | -8.289053 |
| H | 1.387570  | 8.850258  | 7.347203  |
| H | 1.267850  | 7.127770  | 7.710216  |
| H | -1.245440 | 7.213148  | 7.278329  |
| H | -1.066944 | 8.891586  | 6.673345  |
| H | 0.254416  | 6.906479  | 9.839371  |
| H | -0.707276 | 7.640150  | 11.157069 |
| H | 1.667436  | 8.032683  | 11.690660 |
| H | 0.949420  | 9.604759  | 11.189932 |
| H | 3.971702  | 9.560881  | 9.165019  |
| H | 3.445257  | 10.037502 | 10.817001 |
| H | 1.409153  | 11.221933 | 9.593847  |
| H | 3.038313  | 11.993669 | 9.507552  |
| H | 2.423756  | 13.101080 | 7.407574  |
| H | 0.784307  | 12.370210 | 7.547747  |
| H | 2.710715  | 11.617507 | 5.254231  |
| H | 1.656605  | 13.062810 | 5.145520  |
| H | 1.945373  | 10.136298 | 3.326724  |
| H | 0.456976  | 9.145932  | 3.422257  |
| H | 2.599268  | 9.159687  | 5.657656  |
| H | 2.701601  | 8.056409  | 4.272389  |
| H | 1.747745  | 10.981597 | -5.511082 |
| H | 0.874216  | 9.910773  | -4.415219 |
| H | 3.948208  | 9.888304  | -4.845766 |
| H | 3.090991  | 8.986672  | -3.554275 |
| H | 1.949555  | 11.894050 | -1.128111 |
| H | 1.084655  | 10.820087 | -2.265995 |
| H | 1.653275  | 13.817160 | -2.797463 |
| H | 0.106088  | 13.205245 | -2.111922 |
| H | -0.022419 | 14.640690 | -4.539690 |
| H | -0.322764 | 13.420091 | -5.825151 |

|   |           |            |           |
|---|-----------|------------|-----------|
| H | 2.545657  | 14.112423  | -4.927339 |
| H | 1.672499  | 15.092324  | -6.166168 |
| H | 4.160706  | 13.408704  | -6.604494 |
| H | 3.294470  | 14.368762  | -7.857911 |
| H | 4.400211  | 12.681904  | -9.138835 |
| H | 2.726321  | 12.060862  | -8.984818 |
| H | 1.350822  | 10.525160  | -7.512759 |
| H | 0.953711  | 8.904770   | -8.116156 |
| H | 2.904612  | 9.557273   | -9.372416 |
| H | 3.546306  | 8.432461   | -8.136691 |
| C | -3.518225 | -9.516778  | 3.751170  |
| H | -2.149956 | -8.560529  | -7.883735 |
| H | -0.349866 | -8.736875  | -7.902636 |
| H | -1.320092 | -9.205091  | -9.347342 |
| H | -2.667565 | -9.795832  | 3.102475  |
| H | -4.385447 | -9.230420  | 3.128309  |
| H | -3.786800 | -10.363458 | 4.395566  |
| C | -1.051973 | -2.845478  | -1.624487 |
| C | -0.014059 | -3.810793  | -1.552524 |
| C | -0.327625 | -5.185972  | -1.726844 |
| C | -1.666647 | -5.614925  | -1.975899 |
| C | -2.690259 | -4.621476  | -2.043083 |
| C | -2.392520 | -3.242895  | -1.867892 |
| O | -4.044195 | -4.916670  | -2.278695 |
| O | 0.765872  | -6.065206  | -1.639236 |
| C | 0.528079  | -7.502759  | -1.768868 |
| C | -4.432126 | -6.306284  | -2.520869 |
| H | 1.018722  | -3.521780  | -1.364388 |
| H | -1.900280 | -6.668438  | -2.110400 |
| H | -3.199381 | -2.514160  | -1.926482 |
| H | -0.151449 | -7.866009  | -0.976199 |
| H | 0.113772  | -7.749987  | -2.763893 |
| H | 1.514794  | -7.967886  | -1.653348 |
| H | -4.213654 | -6.940275  | -1.641608 |
| H | -5.514865 | -6.275309  | -2.694095 |
| H | -3.921874 | -6.710787  | -3.414190 |
| F | 1.218694  | 2.164163   | -0.897018 |
| F | -1.052397 | 2.649173   | -1.051463 |

2a, UB3LYP/CEP-31G, Electronic State = S<sub>0</sub>, E=-707.9098288 A.U.

|   | x(Å)      | y(Å)      | z(Å)      |
|---|-----------|-----------|-----------|
| C | -0.178191 | 1.180741  | 1.541233  |
| C | -0.545703 | -0.028601 | 2.196031  |
| C | -0.768030 | -1.037584 | 1.206873  |
| N | -0.552185 | -0.479627 | -0.050731 |
| C | -0.196650 | 0.883311  | 0.102530  |
| C | 0.038577  | 1.703966  | -1.041069 |
| C | -0.048127 | 1.146947  | -2.352304 |
| N | -0.333076 | -0.229923 | -2.528626 |
| C | -0.330128 | -0.524111 | -3.890071 |
| C | -0.048217 | 0.675401  | -4.614389 |
| C | 0.125054  | 1.740796  | -3.685729 |
| C | 0.371775  | 3.164111  | -0.859322 |
| C | -0.677146 | 4.107790  | -0.710080 |
| C | -0.357847 | 5.481174  | -0.534401 |
| C | 0.996830  | 5.930132  | -0.513722 |
| C | 2.030952  | 4.958276  | -0.668364 |
| C | 1.728545  | 3.579981  | -0.837356 |
| C | -1.145655 | -2.439891 | 1.379516  |
| C | -1.342975 | -3.027776 | 2.612445  |
| C | -1.725483 | -4.434986 | 2.860814  |
| C | -1.872100 | -4.885802 | 4.217607  |
| C | -2.234682 | -6.217777 | 4.517725  |
| C | -2.462551 | -7.140918 | 3.455922  |
| C | -2.325809 | -6.722312 | 2.097199  |
| C | -1.960738 | -5.382979 | 1.811757  |
| O | -2.818626 | -8.443022 | 3.852835  |
| O | 3.400888  | 5.275102  | -0.658726 |
| O | -1.462363 | 6.339318  | -0.394635 |
| C | -1.223686 | 7.756030  | -0.115843 |
| C | 3.798114  | 6.682830  | -0.600274 |
| C | 0.176914  | 2.444633  | 2.203504  |
| C | -0.099976 | 2.712889  | 3.530352  |
| C | 0.277752  | 3.923752  | 4.287254  |
| C | -0.224357 | 4.102814  | 5.617905  |
| C | 0.094340  | 5.237488  | 6.396770  |
| C | 0.963781  | 6.264595  | 5.885398  |
| C | 1.472527  | 6.087350  | 4.545851  |
| C | 1.138218  | 4.952403  | 3.776498  |
| N | 1.311227  | 7.390900  | 6.662344  |
| C | 0.397081  | 3.145478  | -4.019683 |
| C | 0.686409  | 3.590105  | -5.295373 |
| C | 0.936684  | 4.985251  | -5.708548 |



|   |           |           |           |
|---|-----------|-----------|-----------|
| C | 0.826476  | 6.114955  | -4.829276 |
| C | 1.085545  | 7.427618  | -5.274433 |
| C | 1.471509  | 7.698261  | -6.638933 |
| C | 1.579147  | 6.566943  | -7.523892 |
| C | 1.312502  | 5.257384  | -7.064075 |
| N | 1.722095  | 9.013664  | -7.084902 |
| C | -0.591691 | -1.872362 | -4.393562 |
| C | -0.600141 | -2.193569 | -5.735531 |
| C | -0.856236 | -3.530136 | -6.315534 |
| C | -1.132314 | -4.692071 | -5.522939 |
| C | -1.372761 | -5.953237 | -6.123204 |
| C | -1.340218 | -6.073961 | -7.546020 |
| C | -1.067678 | -4.933985 | -8.356973 |
| C | -0.829970 | -3.683505 | -7.744210 |
| O | -1.563896 | -7.274109 | -8.245567 |
| H | -0.602440 | -0.180781 | 3.267588  |
| H | -0.006107 | 0.755231  | -5.694330 |
| H | -1.722414 | 3.802935  | -0.721882 |
| H | 1.234486  | 6.982657  | -0.379816 |
| H | 2.543862  | 2.868134  | -0.956870 |
| H | -1.267731 | -3.019395 | 0.465933  |
| H | -1.208908 | -2.419861 | 3.514282  |
| H | -1.697605 | -4.181022 | 5.035365  |
| H | -2.345615 | -6.562275 | 5.546537  |
| H | -2.497515 | -7.414851 | 1.272942  |
| H | -1.861183 | -5.078542 | 0.768634  |
| H | -0.660104 | 7.884661  | 0.825999  |
| H | -0.682668 | 8.240983  | -0.949490 |
| H | -2.221808 | 8.200046  | -0.015526 |
| H | 3.469591  | 7.151590  | 0.345832  |
| H | 4.894057  | 6.673518  | -0.646995 |
| H | 3.391730  | 7.245019  | -1.460440 |
| H | 0.697455  | 3.191761  | 1.609932  |
| H | -0.677450 | 1.976532  | 4.101073  |
| H | -0.878485 | 3.336924  | 6.044893  |
| H | -0.312341 | 5.309280  | 7.404257  |
| H | 2.129196  | 6.836115  | 4.102251  |
| H | 1.556054  | 4.862475  | 2.771685  |
| H | 0.354218  | 3.866967  | -3.209511 |
| H | 0.759387  | 2.853754  | -6.103699 |
| H | 0.524808  | 5.968123  | -3.790279 |
| H | 0.964770  | 8.247113  | -4.567291 |
| H | 1.874715  | 6.699085  | -8.564039 |
| H | 1.406263  | 4.423616  | -7.766124 |
| H | -0.784504 | -2.635922 | -3.641885 |
| H | -0.402268 | -1.403028 | -6.468145 |

|   |           |           |           |
|---|-----------|-----------|-----------|
| H | -1.160198 | -4.616504 | -4.434697 |
| H | -1.579458 | -6.814819 | -5.487966 |
| H | -1.048636 | -5.052475 | -9.440961 |
| H | -0.621684 | -2.811357 | -8.370179 |
| C | -1.853714 | -8.484488 | -7.474229 |
| B | -0.636693 | -1.226457 | -1.394669 |
| F | -1.957561 | -1.816687 | -1.571457 |
| F | 0.304134  | -2.338918 | -1.423388 |
| C | 0.703869  | 7.622868  | 8.003998  |
| C | -0.780314 | 8.082660  | 7.916094  |
| S | -1.470195 | 8.826230  | 9.545940  |
| C | -1.054940 | 7.517555  | 10.877691 |
| C | 0.114302  | 7.953715  | 11.787681 |
| O | 1.362126  | 7.909177  | 11.014876 |
| C | 2.380674  | 8.895814  | 11.389017 |
| C | 2.110004  | 10.305007 | 10.819242 |
| O | 2.449383  | 10.330190 | 9.388186  |
| C | 2.186021  | 11.646841 | 8.792667  |
| C | 2.565421  | 11.625858 | 7.297862  |
| S | 1.217889  | 10.859729 | 6.171003  |
| C | 2.181437  | 9.424021  | 5.356863  |
| C | 2.482668  | 8.220250  | 6.296951  |
| C | 1.637591  | 10.178923 | -6.160575 |
| C | 2.837175  | 10.255538 | -5.172380 |
| S | 2.992321  | 11.934200 | -4.244923 |
| C | 1.214892  | 12.365132 | -3.676519 |
| C | 0.568765  | 13.472506 | -4.536947 |
| O | 0.208012  | 12.911079 | -5.843908 |
| C | 0.222270  | 13.855743 | -6.966197 |
| C | 1.639002  | 14.132329 | -7.512347 |
| O | 2.091008  | 12.979059 | -8.304528 |
| C | 3.439449  | 13.191867 | -8.847483 |
| C | 3.859406  | 11.971675 | -9.691137 |
| S | 4.493412  | 10.492603 | -8.651535 |
| C | 1.822422  | 9.302014  | -8.534807 |
| C | 3.245052  | 9.132373  | -9.143788 |
| H | 1.280600  | 8.409455  | 8.500521  |
| H | 0.798717  | 6.718098  | 8.627712  |
| H | -1.462028 | 7.281810  | 7.595823  |
| H | -0.862284 | 8.928827  | 7.218173  |
| H | -0.827123 | 6.560351  | 10.385433 |
| H | -1.970616 | 7.394055  | 11.478907 |
| H | 0.204229  | 7.255047  | 12.645488 |
| H | -0.077635 | 8.970182  | 12.181970 |
| H | 3.326692  | 8.508900  | 10.981936 |
| H | 2.464109  | 8.961075  | 12.493069 |

|   |           |            |            |
|---|-----------|------------|------------|
| H | 1.047632  | 10.586708  | 10.951083  |
| H | 2.745577  | 11.042791  | 11.355732  |
| H | 2.810079  | 12.406541  | 9.312559   |
| H | 1.120400  | 11.915679  | 8.928573   |
| H | 3.500984  | 11.062363  | 7.156035   |
| H | 2.712930  | 12.657886  | 6.941819   |
| H | 3.121464  | 9.843082   | 4.955729   |
| H | 1.542927  | 9.121799   | 4.512991   |
| H | 2.939038  | 8.595026   | 7.226434   |
| H | 3.237779  | 7.583352   | 5.799149   |
| H | 1.637010  | 11.088346  | -6.769283  |
| H | 0.680256  | 10.159050  | -5.612122  |
| H | 3.780812  | 10.209184  | -5.734857  |
| H | 2.824232  | 9.456268   | -4.418200  |
| H | 1.313456  | 12.713165  | -2.635112  |
| H | 0.594529  | 11.456835  | -3.687251  |
| H | 1.272653  | 14.319869  | -4.644125  |
| H | -0.354325 | 13.841379  | -4.042364  |
| H | -0.246493 | 14.815046  | -6.666289  |
| H | -0.391110 | 13.388319  | -7.750645  |
| H | 2.352574  | 14.315894  | -6.685708  |
| H | 1.608547  | 15.032482  | -8.164138  |
| H | 4.155388  | 13.367320  | -8.021080  |
| H | 3.424834  | 14.093346  | -9.498649  |
| H | 4.689807  | 12.255555  | -10.357115 |
| H | 3.012337  | 11.628271  | -10.305365 |
| H | 1.475631  | 10.332899  | -8.702735  |
| H | 1.134215  | 8.634175   | -9.086563  |
| H | 3.194025  | 9.115433   | -10.246753 |
| H | 3.717924  | 8.200313   | -8.800563  |
| C | -3.062630 | -9.444404  | 2.812834   |
| H | -2.778692 | -8.364949  | -6.881475  |
| H | -1.011540 | -8.740329  | -6.806073  |
| H | -1.989998 | -9.276578  | -8.221401  |
| H | -2.158075 | -9.607339  | 2.199314   |
| H | -3.905899 | -9.145465  | 2.164209   |
| H | -3.316858 | -10.365034 | 3.353262   |

**1aH**, UB3LYP/CEP-31G, Electronic State = S<sub>0</sub>, E=-708.7013508 A.U.

|   | x(Å)      | y(Å)      | z(Å)      |
|---|-----------|-----------|-----------|
| C | -0.258037 | 0.911903  | 1.746006  |
| C | -0.621447 | -0.316383 | 2.368739  |
| C | -0.786138 | -1.310808 | 1.359980  |
| C | -0.498023 | -0.635428 | 0.085571  |
| N | -0.188616 | 0.717458  | 0.367292  |
| B | 0.116715  | 1.796439  | -0.686974 |
| N | 0.087235  | 1.139666  | -2.078491 |
| C | -0.167302 | -0.231365 | -2.330015 |
| C | -0.065601 | -0.453109 | -3.781428 |
| C | 0.236409  | 0.820992  | -4.345442 |
| C | 0.324373  | 1.778328  | -3.294445 |
| C | -1.177488 | -2.706644 | 1.582244  |
| C | -1.325340 | -3.260701 | 2.840819  |
| C | -1.743630 | -4.637617 | 3.165380  |
| C | -1.795466 | -5.029083 | 4.548887  |
| C | -2.193640 | -6.325912 | 4.933440  |
| C | -2.557908 | -7.276588 | 3.932998  |
| C | -2.515861 | -6.916625 | 2.549065  |
| C | -2.111565 | -5.611134 | 2.178429  |
| O | -2.942851 | -8.531242 | 4.413463  |
| C | 0.026997  | 2.203738  | 2.374154  |
| C | -0.122260 | 2.418101  | 3.729042  |
| C | 0.169596  | 3.668340  | 4.461628  |
| C | -0.120109 | 3.712834  | 5.869097  |
| C | 0.140841  | 4.866448  | 6.644198  |
| C | 0.709134  | 6.001927  | 6.010895  |
| C | 1.005996  | 5.998195  | 4.621049  |
| C | 0.738558  | 4.839004  | 3.852971  |
| N | 0.987215  | 7.239687  | 6.814263  |
| C | 0.602297  | 3.213422  | -3.388476 |
| C | 0.844521  | 3.843541  | -4.591396 |
| C | 1.113461  | 5.282808  | -4.796644 |
| C | 1.134710  | 6.252047  | -3.733326 |
| C | 1.392773  | 7.617064  | -3.998138 |
| C | 1.633979  | 8.033248  | -5.336855 |
| C | 1.618186  | 7.107976  | -6.409367 |
| C | 1.359716  | 5.743333  | -6.133088 |
| N | 1.910745  | 9.482117  | -5.637233 |
| C | -0.223225 | -1.707786 | -4.523787 |
| C | -0.179039 | -1.781217 | -5.904374 |
| C | -0.300854 | -2.992495 | -6.736953 |
| C | -0.453599 | -4.314449 | -6.201568 |

|   |           |           |            |
|---|-----------|-----------|------------|
| C | -0.556843 | -5.443293 | -7.050051  |
| C | -0.509502 | -5.266400 | -8.468961  |
| C | -0.360799 | -3.960364 | -9.025426  |
| C | -0.257503 | -2.846193 | -8.167651  |
| O | -0.597987 | -6.305072 | -9.399547  |
| H | -0.754244 | -0.461839 | 3.433999   |
| H | 0.386680  | 1.032691  | -5.397133  |
| H | -1.368146 | -3.319853 | 0.707802   |
| H | -1.108738 | -2.637671 | 3.715662   |
| H | -1.519082 | -4.304366 | 5.319457   |
| H | -2.234244 | -6.626775 | 5.980502   |
| H | -2.795881 | -7.632325 | 1.775890   |
| H | -2.089812 | -5.350883 | 1.118610   |
| H | 0.371047  | 2.998335  | 1.711963   |
| H | -0.495349 | 1.600188  | 4.352323   |
| H | -0.555068 | 2.834571  | 6.350685   |
| H | -0.098638 | 4.868525  | 7.709467   |
| H | 1.443315  | 6.877741  | 4.140045   |
| H | 0.978355  | 4.841470  | 2.789313   |
| H | 0.602389  | 3.768746  | -2.450810  |
| H | 0.841815  | 3.246248  | -5.507778  |
| H | 0.945739  | 5.939242  | -2.705893  |
| H | 1.398901  | 8.329989  | -3.170859  |
| H | 1.799049  | 7.434258  | -7.435512  |
| H | 1.346442  | 5.027026  | -6.956813  |
| H | -0.371637 | -2.616593 | -3.950544  |
| H | -0.045293 | -0.854901 | -6.473735  |
| H | -0.486621 | -4.466407 | -5.121101  |
| H | -0.667076 | -6.436038 | -6.613383  |
| H | -0.328279 | -3.854504 | -10.109964 |
| H | -0.141815 | -1.848284 | -8.598997  |
| C | -0.735538 | -7.685141 | -8.919092  |
| C | -0.474120 | -1.120776 | -1.257338  |
| C | -0.268591 | 7.904539  | 7.456104   |
| C | -1.406446 | 8.145940  | 6.436875   |
| S | -2.451535 | 9.686666  | 6.863806   |
| C | -3.170407 | 9.284384  | 8.595625   |
| C | -2.387436 | 9.938547  | 9.751460   |
| O | -1.101817 | 9.237042  | 9.894524   |
| C | -0.098594 | 9.922733  | 10.722436  |
| C | 0.795088  | 10.878565 | 9.904498   |
| O | 1.737583  | 10.085102 | 9.082145   |
| C | 2.684065  | 10.933942 | 8.337566   |
| C | 3.911748  | 10.109876 | 7.899527   |
| S | 3.666507  | 8.920776  | 6.406881   |
| C | 3.482491  | 7.224930  | 7.270033   |

|   |           |           |           |
|---|-----------|-----------|-----------|
| C | 2.082298  | 7.048346  | 7.899212  |
| C | 3.212643  | 9.994151  | -4.969082 |
| C | 4.445125  | 9.198639  | -5.450776 |
| S | 4.719526  | 9.280904  | -7.336542 |
| C | 5.633345  | 10.954829 | -7.523302 |
| C | 4.732426  | 12.144108 | -7.900112 |
| O | 3.829276  | 12.432648 | -6.775516 |
| C | 3.090433  | 13.700095 | -6.887741 |
| C | 2.022342  | 13.702413 | -7.997632 |
| O | 0.988549  | 12.711825 | -7.665325 |
| C | 0.074460  | 12.463558 | -8.791273 |
| C | -1.089265 | 11.575416 | -8.322456 |
| S | -0.587133 | 9.797954  | -7.814535 |
| C | 0.725445  | 10.428129 | -5.305526 |
| C | -0.603692 | 9.930933  | -5.913335 |
| H | 0.102706  | 8.841615  | 7.883033  |
| H | -0.583267 | 7.261377  | 8.286465  |
| H | -2.070680 | 7.276380  | 6.336712  |
| H | -1.015077 | 8.395227  | 5.436710  |
| H | -3.216811 | 8.191102  | 8.716587  |
| H | -4.198431 | 9.677055  | 8.567632  |
| H | -2.961309 | 9.835004  | 10.694253 |
| H | -2.229151 | 11.014515 | 9.547680  |
| H | 0.518012  | 9.130741  | 11.173828 |
| H | -0.591921 | 10.491331 | 11.533121 |
| H | 0.186811  | 11.530309 | 9.248609  |
| H | 1.379879  | 11.515408 | 10.597971 |
| H | 3.046070  | 11.741400 | 9.006248  |
| H | 2.175234  | 11.399666 | 7.472612  |
| H | 4.299482  | 9.511073  | 8.737809  |
| H | 4.704662  | 10.792068 | 7.556473  |
| H | 4.256810  | 7.137945  | 8.046502  |
| H | 3.689023  | 6.479939  | 6.487002  |
| H | 1.905190  | 7.815700  | 8.664054  |
| H | 1.954408  | 6.042189  | 8.321795  |
| H | 3.308446  | 11.051098 | -5.251866 |
| H | 3.075863  | 9.883023  | -3.882512 |
| H | 4.366698  | 8.127671  | -5.217627 |
| H | 5.342835  | 9.596492  | -4.953295 |
| H | 6.369760  | 10.777713 | -8.322090 |
| H | 6.170680  | 11.147787 | -6.582226 |
| H | 4.155256  | 11.918555 | -8.814636 |
| H | 5.371091  | 13.031310 | -8.090989 |
| H | 3.800433  | 14.531845 | -7.064043 |
| H | 2.614332  | 13.841759 | -5.906242 |
| H | 2.464653  | 13.465878 | -8.984233 |

|   |           |            |           |
|---|-----------|------------|-----------|
| H | 1.567272  | 14.711276  | -8.059275 |
| H | 0.630130  | 11.987761  | -9.621851 |
| H | -0.340289 | 13.428107  | -9.149845 |
| H | -1.807260 | 11.441195  | -9.145894 |
| H | -1.612504 | 12.030414  | -7.467620 |
| H | 0.999396  | 11.408966  | -5.718989 |
| H | 0.656611  | 10.473359  | -4.207040 |
| H | -1.404821 | 10.629112  | -5.625347 |
| H | -0.874344 | 8.929873   | -5.551318 |
| C | -3.349287 | -9.567943  | 3.457273  |
| H | -1.667902 | -7.808806  | -8.339864 |
| H | 0.135970  | -7.976327  | -8.306230 |
| H | -0.776104 | -8.299654  | -9.826139 |
| H | -2.517836 | -9.822059  | 2.775913  |
| H | -4.231812 | -9.243556  | 2.877770  |
| H | -3.606004 | -10.438173 | 4.072747  |
| C | -0.768892 | -2.572352  | -1.540424 |
| C | 0.287727  | -3.517875  | -1.503234 |
| C | 0.004881  | -4.886445  | -1.771052 |
| C | -1.321000 | -5.320656  | -2.077647 |
| C | -2.363514 | -4.344578  | -2.108058 |
| C | -2.096198 | -2.972755  | -1.840434 |
| O | -3.701996 | -4.644038  | -2.391445 |
| O | 1.110807  | -5.743157  | -1.712191 |
| C | 0.916339  | -7.179624  | -1.936058 |
| C | -4.071937 | -6.024436  | -2.721560 |
| H | 1.311310  | -3.226106  | -1.273101 |
| H | -1.531645 | -6.367881  | -2.281440 |
| H | -2.917581 | -2.258633  | -1.874442 |
| H | 0.231160  | -7.606925  | -1.182167 |
| H | 0.531908  | -7.372808  | -2.953865 |
| H | 1.913283  | -7.622186  | -1.826022 |
| H | -3.860686 | -6.703842  | -1.876034 |
| H | -5.151299 | -5.992233  | -2.910815 |
| H | -3.542335 | -6.368538  | -3.627948 |
| F | 1.413614  | 2.416097   | -0.431394 |
| F | -0.849177 | 2.886174   | -0.608744 |
| H | 2.065259  | 9.567601   | -6.662213 |
| H | 1.388979  | 7.959966   | 6.178835  |

**2aH**, UB3LYP/CEP-31G, Electronic State = S<sub>0</sub>, E=-708.7054738 A.U.

|   | x(Å)      | y(Å)      | z(Å)      |
|---|-----------|-----------|-----------|
| C | -0.288345 | 1.156786  | 1.882772  |
| C | -0.602624 | -0.134184 | 2.382568  |
| C | -0.623942 | -1.060484 | 1.288133  |
| N | -0.332817 | -0.355195 | 0.122257  |
| C | -0.124780 | 1.007989  | 0.427949  |
| C | 0.163557  | 1.948997  | -0.608863 |
| C | 0.264605  | 1.509340  | -1.964055 |
| N | 0.112719  | 0.141847  | -2.286152 |
| C | 0.274587  | -0.039189 | -3.657893 |
| C | 0.528150  | 1.243294  | -4.246672 |
| C | 0.522202  | 2.226695  | -3.223224 |
| C | 0.367733  | 3.404630  | -0.264025 |
| C | -0.750915 | 4.275211  | -0.176913 |
| C | -0.548571 | 5.638870  | 0.173585  |
| C | 0.759348  | 6.150988  | 0.436914  |
| C | 1.866766  | 5.253508  | 0.335520  |
| C | 1.679567  | 3.886996  | -0.012204 |
| C | -0.882726 | -2.492960 | 1.296018  |
| C | -1.166776 | -3.202281 | 2.451120  |
| C | -1.437221 | -4.645422 | 2.551749  |
| C | -1.717398 | -5.207769 | 3.846666  |
| C | -1.983731 | -6.582441 | 4.008252  |
| C | -1.976557 | -7.440338 | 2.866245  |
| C | -1.700747 | -6.909400 | 1.566026  |
| C | -1.435290 | -5.527724 | 1.419343  |
| O | -2.251225 | -8.783589 | 3.127897  |
| O | 3.198533  | 5.632081  | 0.568757  |
| O | -1.714735 | 6.419005  | 0.234741  |
| C | -1.616663 | 7.815386  | 0.664598  |
| C | 3.492500  | 7.018163  | 0.937080  |
| C | -0.136624 | 2.366955  | 2.706035  |
| C | -0.462406 | 2.406333  | 4.046912  |
| C | -0.291337 | 3.546057  | 4.972657  |
| C | -0.731568 | 3.381441  | 6.331785  |
| C | -0.589522 | 4.412336  | 7.289658  |
| C | 0.005289  | 5.637935  | 6.892954  |
| C | 0.452350  | 5.840499  | 5.560041  |
| C | 0.302154  | 4.803369  | 4.608192  |
| N | 0.176490  | 6.745123  | 7.898536  |
| C | 0.710180  | 3.671143  | -3.437858 |
| C | 0.983765  | 4.206974  | -4.680123 |
| C | 1.143327  | 5.633032  | -5.034520 |



|   |           |           |           |
|---|-----------|-----------|-----------|
| C | 1.035160  | 6.721649  | -4.098993 |
| C | 1.178295  | 8.064105  | -4.523163 |
| C | 1.432834  | 8.339036  | -5.895452 |
| C | 1.550204  | 7.293135  | -6.843743 |
| C | 1.408430  | 5.953989  | -6.408587 |
| N | 1.572252  | 9.759804  | -6.372676 |
| C | 0.183711  | -1.344402 | -4.295777 |
| C | 0.346242  | -1.530076 | -5.658797 |
| C | 0.277456  | -2.806853 | -6.386975 |
| C | 0.033694  | -4.067972 | -5.745788 |
| C | -0.021168 | -5.269802 | -6.489763 |
| C | 0.168985  | -5.230794 | -7.907880 |
| C | 0.412283  | -3.987997 | -8.568546 |
| C | 0.465027  | -2.798661 | -7.814155 |
| O | 0.136847  | -6.351364 | -8.739218 |
| H | -0.767886 | -0.400296 | 3.419739  |
| H | 0.679166  | 1.415056  | -5.305491 |
| H | -1.763445 | 3.921167  | -0.365181 |
| H | 0.907853  | 7.193919  | 0.707637  |
| H | 2.548026  | 3.232810  | -0.074528 |
| H | -0.844865 | -2.998911 | 0.333529  |
| H | -1.199995 | -2.661581 | 3.404040  |
| H | -1.723706 | -4.554381 | 4.723400  |
| H | -2.196989 | -7.015188 | 4.985844  |
| H | -1.691369 | -7.552716 | 0.686467  |
| H | -1.225857 | -5.137757 | 0.421949  |
| H | -1.201348 | 7.888850  | 1.686230  |
| H | -0.997746 | 8.406409  | -0.035932 |
| H | -2.647095 | 8.190320  | 0.654776  |
| H | 2.995175  | 7.292818  | 1.885594  |
| H | 4.580840  | 7.054791  | 1.065443  |
| H | 3.185964  | 7.716154  | 0.136153  |
| H | 0.272147  | 3.253062  | 2.225524  |
| H | -0.899987 | 1.515063  | 4.505116  |
| H | -1.185094 | 2.434799  | 6.632500  |
| H | -0.933510 | 4.245767  | 8.312380  |
| H | 0.916699  | 6.785499  | 5.268839  |
| H | 0.655152  | 4.966761  | 3.589524  |
| H | 0.605207  | 4.327088  | -2.576294 |
| H | 1.094215  | 3.524977  | -5.527404 |
| H | 0.834354  | 6.518058  | -3.046261 |
| H | 1.084805  | 8.870018  | -3.791790 |
| H | 1.742003  | 7.509422  | -7.896768 |
| H | 1.496448  | 5.146398  | -7.137686 |
| H | -0.021168 | -2.191341 | -3.644284 |
| H | 0.549026  | -0.655035 | -6.286974 |

|   |           |           |           |
|---|-----------|-----------|-----------|
| H | -0.111797 | -4.113811 | -4.665292 |
| H | -0.206913 | -6.211428 | -5.973572 |
| H | 0.553167  | -3.989284 | -9.649551 |
| H | 0.652261  | -1.849264 | -8.323306 |
| C | -0.102693 | -7.674795 | -8.147697 |
| B | -0.209042 | -0.983339 | -1.281186 |
| F | -1.442006 | -1.651556 | -1.648415 |
| F | 0.834686  | -1.989167 | -1.294349 |
| C | -1.178230 | 7.280862  | 8.430735  |
| C | -2.035060 | 7.871705  | 7.290790  |
| S | -1.194434 | 9.324933  | 6.383610  |
| C | -1.591715 | 10.792696 | 7.550724  |
| C | -0.470849 | 11.153440 | 8.542121  |
| O | -0.325696 | 10.059198 | 9.511112  |
| C | 0.522554  | 10.365988 | 10.674113 |
| C | 2.015977  | 10.524386 | 10.331543 |
| O | 2.531655  | 9.242295  | 9.829528  |
| C | 3.874051  | 9.375782  | 9.244462  |
| C | 4.434785  | 7.982992  | 8.914715  |
| S | 3.481193  | 7.033018  | 7.551041  |
| C | 2.462172  | 5.807909  | 8.598161  |
| C | 1.109957  | 6.372511  | 9.082682  |
| C | 2.793482  | 10.486081 | -5.754127 |
| C | 4.115521  | 9.787251  | -6.139053 |
| S | 4.406737  | 9.696326  | -8.021989 |
| C | 5.104032  | 11.442810 | -8.392014 |
| C | 4.068465  | 12.457430 | -8.908887 |
| O | 3.119725  | 12.767037 | -7.827916 |
| C | 2.242987  | 13.920059 | -8.090308 |
| C | 1.210680  | 13.678518 | -9.208116 |
| O | 0.290801  | 12.613053 | -8.785170 |
| C | -0.545460 | 12.125849 | -9.893735 |
| C | -1.598964 | 11.147058 | -9.350358 |
| S | -0.889093 | 9.528935  | -8.612740 |
| C | 0.287712  | 10.613319 | -6.192597 |
| C | -0.966886 | 9.904399  | -6.745600 |
| H | -0.936438 | 8.056262  | 9.169738  |
| H | -1.692377 | 6.430223  | 8.902909  |
| H | -2.988223 | 8.230893  | 7.707331  |
| H | -2.254861 | 7.130860  | 6.509553  |
| H | -2.524377 | 10.549480 | 8.081929  |
| H | -1.779228 | 11.640724 | 6.874256  |
| H | -0.754734 | 12.082534 | 9.078721  |
| H | 0.479921  | 11.328442 | 8.006658  |
| H | 0.379361  | 9.520298  | 11.362415 |
| H | 0.162107  | 11.290989 | 11.165128 |

|   |           |            |            |
|---|-----------|------------|------------|
| H | 2.173567  | 11.313798  | 9.571387   |
| H | 2.567015  | 10.816012  | 11.247819  |
| H | 4.550067  | 9.862548   | 9.977307   |
| H | 3.821917  | 10.009900  | 8.338124   |
| H | 4.454377  | 7.343682   | 9.810334   |
| H | 5.461077  | 8.079741   | 8.528506   |
| H | 3.062913  | 5.528957   | 9.477264   |
| H | 2.338151  | 4.914667   | 7.971297   |
| H | 1.257283  | 7.299752   | 9.654486   |
| H | 0.571286  | 5.624425   | 9.685065   |
| H | 2.775456  | 11.510417  | -6.150621  |
| H | 2.648123  | 10.478247  | -4.662950  |
| H | 4.152382  | 8.744919   | -5.792238  |
| H | 4.955694  | 10.334946  | -5.685151  |
| H | 5.873447  | 11.272744  | -9.160618  |
| H | 5.592762  | 11.807607  | -7.475723  |
| H | 3.536189  | 12.053530  | -9.788472  |
| H | 4.596554  | 13.386858  | -9.206608  |
| H | 2.857987  | 14.804371  | -8.348578  |
| H | 1.728905  | 14.111207  | -7.136753  |
| H | 1.703044  | 13.393779  | -10.157555 |
| H | 0.643570  | 14.614434  | -9.384011  |
| H | 0.094518  | 11.640948  | -10.655616 |
| H | -1.069212 | 12.982503  | -10.365634 |
| H | -2.255579 | 10.818584  | -10.170494 |
| H | -2.216021 | 11.623039  | -8.573073  |
| H | 0.471688  | 11.552330  | -6.733928  |
| H | 0.183453  | 10.799314  | -5.111560  |
| H | -1.841392 | 10.548083  | -6.563139  |
| H | -1.144948 | 8.936817   | -6.257211  |
| C | -2.269504 | -9.740189  | 2.012903   |
| H | -1.091265 | -7.712020  | -7.657406  |
| H | 0.691747  | -7.930604  | -7.424913  |
| H | -0.077984 | -8.372195  | -8.993271  |
| H | -1.282113 | -9.788098  | 1.521109   |
| H | -3.048989 | -9.471153  | 1.278729   |
| H | -2.505849 | -10.707159 | 2.472346   |
| H | 1.753634  | 9.728135   | -7.396463  |
| H | 0.632614  | 7.546256   | 7.417863   |

**BODIPY**, UB3LYP/6-31G(d), Electronic State = S<sub>0</sub>, E=-681.3758523 A.U.

|   | x(Å)      | y(Å)      | z(Å)      |
|---|-----------|-----------|-----------|
| C | -0.444826 | 0.820165  | 1.369274  |
| C | -0.769912 | -0.362821 | 2.069884  |
| C | -0.919236 | -1.360607 | 1.117215  |
| C | -0.680963 | -0.764755 | -0.149347 |
| N | -0.390874 | 0.584416  | 0.051666  |
| B | -0.063622 | 1.636997  | -1.073523 |
| N | -0.133451 | 0.833897  | -2.426779 |
| C | -0.430906 | -0.522338 | -2.558236 |
| C | -0.393571 | -0.852770 | -3.938586 |
| C | -0.073592 | 0.309453  | -4.625819 |
| C | 0.078522  | 1.324672  | -3.655162 |
| H | -0.877000 | -0.451933 | 3.142114  |
| H | 0.041876  | 0.434865  | -5.693539 |
| C | -0.698445 | -1.298325 | -1.434445 |
| F | 1.209272  | 2.139524  | -0.890948 |
| F | -1.015579 | 2.636918  | -1.070925 |
| H | -1.168710 | -2.400795 | 1.281538  |
| H | -0.251961 | 1.811233  | 1.758237  |
| H | -0.582892 | -1.835142 | -4.351316 |
| H | 0.327290  | 2.368429  | -3.794614 |
| H | -0.927526 | -2.351928 | -1.564397 |

**3,5-distyryl BODIPY**, UB3LYP/6-31G(d), Electronic State = S<sub>0</sub>, E=-1298.3156341 A.U.

|   | x(Å)      | y(Å)      | z(Å)      |
|---|-----------|-----------|-----------|
| C | -0.363821 | 1.017520  | 1.423870  |
| C | -0.644529 | -0.208195 | 2.101345  |
| C | -0.816100 | -1.183711 | 1.142761  |
| C | -0.638040 | -0.562933 | -0.123542 |
| N | -0.360647 | 0.782560  | 0.082739  |
| B | -0.277649 | 1.844234  | -1.073774 |
| N | -0.104035 | 1.030483  | -2.407771 |
| C | -0.393618 | -0.322700 | -2.529080 |
| C | -0.304680 | -0.679341 | -3.902233 |
| C | 0.037037  | 0.461109  | -4.597067 |
| C | 0.155997  | 1.523534  | -3.650058 |
| C | -0.096723 | 2.320384  | 1.979002  |
| C | -0.207809 | 2.617921  | 3.296042  |
| C | 0.053911  | 3.907193  | 3.928726  |
| C | -0.097868 | 4.019425  | 5.324718  |
| C | 0.139569  | 5.223507  | 5.982927  |
| C | 0.534801  | 6.348989  | 5.258340  |
| C | 0.688898  | 6.256984  | 3.870826  |
| C | 0.452427  | 5.055289  | 3.212986  |
| C | 0.509902  | 2.902614  | -3.872491 |
| C | 0.648691  | 3.460136  | -5.099460 |
| C | 1.016250  | 4.841227  | -5.397174 |
| C | 1.273131  | 5.806320  | -4.401247 |
| C | 1.622029  | 7.107426  | -4.744794 |
| C | 1.724500  | 7.483675  | -6.088429 |
| C | 1.472574  | 6.542398  | -7.087661 |
| C | 1.122713  | 5.238824  | -6.744391 |
| H | -0.688119 | -0.334110 | 3.174156  |
| H | 0.211728  | 0.548792  | -5.660290 |
| H | 0.217063  | 3.076427  | 1.268577  |
| H | -0.527111 | 1.833558  | 3.981123  |
| H | -0.406213 | 3.145248  | 5.893806  |
| H | 0.015731  | 5.283247  | 7.060918  |
| H | 0.994394  | 7.129614  | 3.299670  |
| H | 0.574270  | 5.006122  | 2.135344  |
| H | 0.674841  | 3.492078  | -2.977970 |
| H | 0.470682  | 2.839021  | -5.976524 |
| H | 1.197042  | 5.535404  | -3.352770 |
| H | 1.815204  | 7.835207  | -3.961175 |
| H | 1.548151  | 6.823286  | -8.134728 |
| H | 0.927132  | 4.509117  | -7.526940 |
| C | -0.666161 | -1.099560 | -1.407157 |

|   |           |           |           |
|---|-----------|-----------|-----------|
| F | 0.826761  | 2.674173  | -0.876887 |
| F | -1.446989 | 2.583353  | -1.120830 |
| H | 0.720529  | 7.290748  | 5.767411  |
| H | 1.997329  | 8.502021  | -6.351303 |
| H | -0.884823 | -2.154993 | -1.534787 |
| H | -0.461628 | -1.673823 | -4.299558 |
| H | -1.027652 | -2.233752 | 1.298152  |

**1,7-distyryl BODIPY**, UB3LYP/6-31G(d), Electronic State = S<sub>0</sub>, E=-1298.3064841 A.U.

|   | x(Å)      | y(Å)      | z(Å)      |
|---|-----------|-----------|-----------|
| C | -0.468463 | 0.894843  | 1.377254  |
| C | -0.791835 | -0.269435 | 2.081134  |
| C | -0.898252 | -1.310087 | 1.141946  |
| C | -0.627430 | -0.706119 | -0.134508 |
| N | -0.366984 | 0.644129  | 0.058653  |
| B | 0.043278  | 1.672630  | -1.054913 |
| N | -0.118862 | 0.894550  | -2.409385 |
| C | -0.389879 | -0.460812 | -2.543386 |
| C | -0.393475 | -0.793585 | -3.942250 |
| C | -0.118891 | 0.409263  | -4.616213 |
| C | 0.039849  | 1.403232  | -3.645506 |
| C | -1.212157 | -2.704550 | 1.346168  |
| C | -1.510266 | -3.269785 | 2.539655  |
| C | -1.827919 | -4.671358 | 2.804231  |
| C | -2.178419 | -5.047588 | 4.115634  |
| C | -2.496302 | -6.366723 | 4.429680  |
| C | -2.469434 | -7.347511 | 3.437268  |
| C | -2.119896 | -6.994277 | 2.129724  |
| C | -1.802896 | -5.677201 | 1.816333  |
| C | -0.643605 | -2.111131 | -4.477135 |
| C | -0.653576 | -2.429591 | -5.792929 |
| C | -0.901554 | -3.741213 | -6.387420 |
| C | -1.192699 | -4.896942 | -5.633855 |
| C | -1.420049 | -6.118353 | -6.258094 |
| C | -1.364057 | -6.223531 | -7.651819 |
| C | -1.077974 | -5.090711 | -8.414963 |
| C | -0.850466 | -3.867271 | -7.789446 |
| H | -0.928733 | -0.336814 | 3.151315  |
| H | -0.044697 | 0.559234  | -5.684181 |
| H | -1.203179 | -3.330265 | 0.456065  |
| H | -1.528208 | -2.626922 | 3.418803  |
| H | -2.201606 | -4.287739 | 4.893374  |
| H | -2.764475 | -6.628762 | 5.449604  |
| H | -2.092599 | -7.752575 | 1.351653  |
| H | -1.527896 | -5.428371 | 0.795585  |
| H | -0.835197 | -2.893744 | -3.745878 |
| H | -0.456572 | -1.635563 | -6.512062 |
| H | -1.243274 | -4.839773 | -4.550513 |
| H | -1.643062 | -6.995402 | -5.656246 |
| H | -1.032054 | -5.159250 | -9.498482 |
| H | -0.628114 | -2.988084 | -8.389775 |
| C | -0.631325 | -1.243731 | -1.418255 |

|   |           |           |           |
|---|-----------|-----------|-----------|
| F | 1.362957  | 2.050557  | -0.884206 |
| F | -0.804134 | 2.763882  | -1.028554 |
| H | -2.715632 | -8.377969 | 3.677840  |
| H | -1.542604 | -7.179857 | -8.135442 |
| H | -0.845332 | -2.299452 | -1.547084 |
| H | 0.259942  | 2.454141  | -3.778959 |
| H | -0.303320 | 1.894549  | 1.756662  |



**1,3,5,7-tetrasteryl BODIPY**, UB3LYP/6-31G(d), Electronic State = S<sub>0</sub>, E=-1915.2445276 A.U.

|   | x(Å)      | y(Å)      | z(Å)      |
|---|-----------|-----------|-----------|
| C | -0.436912 | 0.978962  | 1.416571  |
| C | -0.746916 | -0.223895 | 2.093511  |
| C | -0.943993 | -1.224247 | 1.141544  |
| C | -0.740093 | -0.591588 | -0.134435 |
| N | -0.431001 | 0.741556  | 0.070467  |
| B | -0.314863 | 1.801507  | -1.080883 |
| N | -0.161106 | 0.985954  | -2.412701 |
| C | -0.481075 | -0.354318 | -2.539582 |
| C | -0.403148 | -0.722653 | -3.928146 |
| C | -0.030628 | 0.438651  | -4.605404 |
| C | 0.109524  | 1.479746  | -3.658251 |
| C | -1.267219 | -2.621793 | 1.325366  |
| C | -1.438501 | -3.234934 | 2.519069  |
| C | -1.770141 | -4.639182 | 2.755726  |
| C | -1.867004 | -5.096246 | 4.084434  |
| C | -2.177657 | -6.423031 | 4.373261  |
| C | -2.401549 | -7.330391 | 3.336987  |
| C | -2.312011 | -6.895019 | 2.010728  |
| C | -2.001786 | -5.570484 | 1.722831  |
| C | -0.140465 | 2.280924  | 1.964350  |
| C | -0.269983 | 2.597783  | 3.274292  |
| C | 0.020540  | 3.886123  | 3.897488  |
| C | -0.153514 | 4.019678  | 5.288846  |
| C | 0.109941  | 5.223391  | 5.937952  |
| C | 0.553940  | 6.327182  | 5.208373  |
| C | 0.730389  | 6.213917  | 3.825103  |
| C | 0.468202  | 5.012475  | 3.176502  |
| C | 0.495619  | 2.854381  | -3.867754 |
| C | 0.624174  | 3.426691  | -5.088068 |
| C | 1.024243  | 4.801973  | -5.372910 |
| C | 1.337921  | 5.741122  | -4.368658 |
| C | 1.715306  | 7.037465  | -4.700053 |
| C | 1.790677  | 7.434492  | -6.039481 |
| C | 1.482781  | 6.518873  | -7.046773 |
| C | 1.104393  | 5.220086  | -6.715561 |
| C | -0.654509 | -2.049962 | -4.444559 |
| C | -0.608024 | -2.401805 | -5.749989 |
| C | -0.855367 | -3.723879 | -6.323270 |
| C | -1.167749 | -4.862576 | -5.552778 |
| C | -1.394617 | -6.094294 | -6.156941 |
| C | -1.316031 | -6.227664 | -7.547092 |
| C | -1.006752 | -5.112384 | -8.326700 |

C -0.779550 -3.878760 -7.721102  
H -0.795570 -0.335820 3.167393  
H 0.154350 0.536773 -5.665713  
H -1.376903 -3.206793 0.414779  
H -1.318738 -2.639115 3.423162  
H -1.693442 -4.394412 4.897013  
H -2.245034 -6.748030 5.408065  
H -2.487182 -7.594021 1.197096  
H -1.942355 -5.255287 0.685261  
H 0.211046 3.017894 1.251736  
H -0.630222 1.833107 3.961455  
H -0.500031 3.162498 5.861840  
H -0.031894 5.299737 7.012690  
H 1.073684 7.069681 3.249891  
H 0.607944 4.946695 2.101926  
H 0.691900 3.425175 -2.967640  
H 0.408774 2.825079 -5.970417  
H 1.284191 5.453649 -3.323203  
H 1.952320 7.745148 -3.910078  
H 1.536924 6.815950 -8.090716  
H 0.865153 4.510396 -7.504385  
H -0.903348 -2.808020 -3.705068  
H -0.364428 -1.630313 -6.479490  
H -1.232340 -4.784608 -4.471461  
H -1.633661 -6.957721 -5.541600  
H -0.942084 -5.202453 -9.407757  
H -0.539192 -3.013510 -8.334708  
C -0.777517 -1.124702 -1.419285  
F 0.814241 2.599073 -0.879127  
F -1.459871 2.579025 -1.129100  
H -2.644756 -8.366077 3.557428  
H -1.493790 -7.191990 -8.014927  
H 0.759995 7.268628 5.710181  
H 2.086088 8.448954 -6.292831  
H -1.023623 -2.172355 -1.549493

## References:

- 1) S. Atilgan, I. Kutuk and T. Ozdemir, *Tetrahedron Lett.*, 2010, **51**, 892.
- 2) S. Erbas, A. Gorgulu, M. Kocakusakogullari and E. U. Akkaya, *Chem. Commun.*, 2009, 4956.
- 3) O. Buyukcakil, O. A. Bozdemir, S. Kolemen, S. Erbas and E. U. Akkaya, *Org. Lett.*, 2009, **11**, 4644.

- 4) O.A. Bozdemir, R. Guliyev, O. Buyukcakil, S. Selcuk, S. Kolemen, G. Gulseren, T. Nalbantoglu, H. Boyaci and E.U. Akkaya, *J. Am. Chem. Soc.*, 2010, **132**, 8029.
- 5) C. Lee, W. Yang and R. G. Parr, *Phys. Rev. B* 1988, **37**, 785.
- 6) W. J. Stevens, H. Basch and M. Krauss, *J. Chem. Phys.* 1984, **81**, 6026.
- 7) S. Duman, Y. Cakmak, S. Kolemen, E. U. Akkaya and Y. Dede, *J. Org. Chem.* 2012, **77**, 4516.
- 8) W. J. Hehre, R. Ditchfield and J. Pople, *A. J. Chem. Phys.* 1972, **56**, 2257.
- 9) Jr. T. H. Dunning, Gaussian basis sets for use in correlated molecular calculations. I. The atoms boron through neon and hydrogen. *J. Chem. Phys.* 1989, **90**, 1007.
- 10) M. J. Frisch, et al. Gaussian 03, revision C.02; Gaussian Inc.: Wallingford, CT, 2004.
